1 **Rapid development of SARS-CoV-2 receptor binding domain-conjugated**  
2 **nanoparticle vaccine candidate**

3

4 Yin-Feng Kang<sup>1\*</sup>, Cong Sun<sup>1\*</sup>, Zhen Zhuang<sup>2\*</sup>, Run-Yu Yuan<sup>3\*</sup>, Qing-Bing Zheng<sup>4</sup>,  
5 Jiang-Ping Li<sup>1</sup>, Ping-Ping Zhou<sup>3</sup>, Xin-Chun Chen<sup>1</sup>, Xiao Zhang<sup>1</sup>, Xiao-Hui Yu<sup>1</sup>,  
6 Xiang-Wei Kong<sup>1</sup>, Qian-Ying Zhu<sup>1</sup>, Miao Xu<sup>1</sup>, Nan-Shan Zhong<sup>2</sup>, Yi-Xin Zeng<sup>1</sup>,  
7 Guo-Kai Feng<sup>1†</sup>, Chang-Wen Ke<sup>3†</sup>, Jin-Cun Zhao<sup>2†</sup>, Mu-Sheng Zeng<sup>1†</sup>

8

9 <sup>1</sup> State Key Laboratory of Oncology in South China, Collaborative Innovation Center  
10 for Cancer Medicine, Guangdong Key Laboratory of Nasopharyngeal Carcinoma  
11 Diagnosis and Therapy, Department of Experimental Research, Sun Yat-sen  
12 University Cancer Center, Sun Yat-sen University, Guangzhou, Guangdong, P. R.  
13 China.

14 <sup>2</sup> State Key Laboratory of Respiratory Disease, National Clinical Research Center for  
15 Respiratory Disease, Guangzhou Institute of Respiratory Health, the First Affiliated  
16 Hospital of Guangzhou Medical University, Guangzhou, P. R. China.

17 <sup>3</sup> Guangdong Provincial Institution of Public Health, Guangdong Provincial Center  
18 for Disease Control and Prevention, Guangzhou, Guangdong, P. R. China.

19 <sup>4</sup> State Key Laboratory of Molecular Vaccinology and Molecular Diagnostics,  
20 National Institute of Diagnostics and Vaccine Development in Infectious Diseases,  
21 School of Public Health, Xiamen University, Xiamen, Fujian, PR China

22 \*These authors contributed equally to this work.

23 †Correspondence: [fengguok@sysucc.org.cn](mailto:fengguok@sysucc.org.cn) (G.F.), [kecw1965@aliyun.com](mailto:kecw1965@aliyun.com) (C.K.),  
24 [zhaojincun@gird.cn](mailto:zhaojincun@gird.cn) (J.Z.), [zengmsh@sysucc.org.cn](mailto:zengmsh@sysucc.org.cn) (M.Z.)

25

26 **Abstract**

27 The ongoing of coronavirus disease 2019 (COVID-19) pandemic caused by novel  
28 SARS-CoV-2 coronavirus, resulting in economic losses and seriously threatening the  
29 human health in worldwide, highlighting the urgent need of a stabilized, easily  
30 produced and effective preventive vaccine. The SARS-COV-2 spike protein receptor

31 binding region (RBD) plays an important role in the process of viral binding receptor  
32 angiotensin-converting enzyme 2 (ACE2) and membrane fusion, making it an ideal  
33 target for vaccine development. In this study, we designed three different  
34 RBD-conjugated nanoparticles vaccine candidates, RBD-Ferritin (24-mer), RBD-mi3  
35 (60-mer) and RBD-I53-50 (120-mer), with the application of covalent bond linking by  
36 SpyTag-SpyCatcher system. It was demonstrated that the neutralizing capability of  
37 sera from mice immunized with three RBD-conjugated nanoparticles adjuvanted with  
38 AddaVax or Sigma System Adjuvant (SAS) after each immunization was ~8- to  
39 120-fold greater than monomeric RBD group in SARS-CoV-2 pseudovirus and  
40 authentic virus neutralization assay. Most importantly, sera from RBD-conjugated  
41 NPs groups more efficiently blocked the binding of RBD to ACE2 or neutralizing  
42 antibody in vitro, a further proof of promising immunization effect. Besides, high  
43 physical stability and flexibility in assembly consolidated the benefit for rapid  
44 scale-up production of vaccine. These results supported that our designed  
45 SARS-CoV-2 RBD-conjugated nanoparticle was competitive vaccine candidate and  
46 the carrier nanoparticles could be adopted as universal platform for future vaccine  
47 development.

48

## 49 **1. Introduction**

50 The unexpected outbreak of COVID-19 pandemic since 2019 has become a global  
51 public health crisis affecting 216 countries or regions, 26016839 confirmed cases and  
52 over 850000 confirmed death  
53 (<https://www.who.int/emergencies/diseases/novel-coronavirus-2019>). SARS-CoV-2,  
54 the causative virus affirmed by laboratory evaluation and comprehensive sequencing,  
55 belongs to  $\beta$ -coronavirus in coronavirus family which comprises other  
56 highly-pathogenetic virus strains (SARS-CoV, MERS-CoV) for humans <sup>1-3</sup>. The  
57 infection caused a diverse clinical characterization of respiratory syndrome and  
58 person-to-person transmission <sup>4</sup>, and even led to death <sup>5-6</sup>.

59 As a member of coronavirus, SARS-CoV-2 adopts a similar cell-entry mechanism  
60 relying on spike protein on viral membrane to fulfill the host cell recognition,

61 attachment and membrane fusion, while the spike protein of coronavirus also shared  
62 great similarity in structural appearance as a trimeric fusion protein<sup>7-9</sup>. Specifically,  
63 SARS-CoV-2 spike protein recognize the angiotensin converting enzyme 2 (ACE2) as  
64 the entry receptor like SARS-CoV and the key binding interface lies on the receptor  
65 binding domain (RBD) of the spike protein, which has been confirmed by both  
66 structural elucidation through high resolution Cryo-EM structure and interface  
67 mutation scanning in previous work<sup>10-11</sup>.

68 With the basis of clear structural information and biological function of  
69 SARS-CoV-2 spike protein and the key region RBD, most neutralizing antibodies and  
70 potential therapeutic agent are found against the spike protein RBD, making this  
71 region an ideal target for vaccine development<sup>8, 12-13</sup>. However, despite a  
72 comprehensive effort on RBD-based vaccine, application of RBD subunit is still  
73 hindered by the quite low immunogenicity due to a variety of reason<sup>14</sup>. To increase  
74 the immunogenicity, scientists endeavor to modify the RBD to achieve larger  
75 antigen-carrier complex size or multimerization, which would complicate the overall  
76 structure of RBD and prolong the production and validation process of the  
77 recombinant modified antigen<sup>15-16</sup>. To shorten the time cost of vaccine development  
78 during emergency, a more compact workflow of antigen-displayed nanoparticle  
79 production is in demand. Protein covalent bond linking strategy has enjoyed a rapid  
80 development in recent years, rendering greater easiness to protein modification and  
81 multimerization<sup>17-19</sup>. SpyTag-SpyCatcher system has been used as a strategy for  
82 antigen display on particles in hepatitis B<sup>20</sup> and HIV<sup>21</sup> vaccine development,  
83 overcoming the obstacles in massive in vitro production of fusion protein of antigen  
84 and nanoparticle scaffold.

85 Here we reported our designed SARS-CoV-2 spike protein RBD-based nanoparticle  
86 vaccines in application of the covalent bond linking strategy. With SpyTag fused to  
87 the C-terminus of RBD, the antigen could covalently be linked to the SpyCatcher upon  
88 the nanoparticle scaffold. The RBD nanoparticles could elicit higher neutralizing  
89 antibody titers compared to monomer RBD in mice, confirmed by stronger sera  
90 RBD-competition with both ACE2 and neutralizing antibody. Besides, our work

91 validated 3 different nanoparticles platform with SpyCatcher in N-terminus viable for  
92 SpyTag-fused protein coupling, which could become general nanoparticle capture  
93 platform for other antigen in the future.

## 94 **2. Results**

### 95 **2.1. Design and production of RBD-conjugated nanoparticles**

96 Previous studies have demonstrated that immunization with receptor binding  
97 region (RBD) of SARS-CoV-2 Spike protein formulated with aluminum hydroxide  
98 adjuvant in mice elicited higher neutralization antibody titers in comparison with the  
99 extracellular domain protein (ECD), S1-subunit protein (S1) and S2-subunit protein  
100 (S2)<sup>22</sup>. In addition, RBD amino acid sequences from 24 representative SARS CoV-2  
101 strains isolated in different countries were aligned and founded to be very  
102 conservative (Figure S1, Supporting Information). In the present study, we focused on  
103 the RBD of SARS-CoV-2 S glycoprotein to design the RBD-conjugated nanoparticle  
104 vaccine based on the SpyTag-SpyCatcher system. As mentioned in previous study  
105 <sup>17-18</sup>, the enhanced shortening form of SpyCatcher,  $\Delta$ N1-SpyCatcher was used in our  
106 study. Therefore, we engineered and adapted three  $\Delta$ N1-SpyCatcher-nanoparticles ( $\Delta$   
107 N1-SpyCatcher-NPs) conjugation platform,  $\Delta$  N1-SpyCatcher-Ferritin,  $\Delta$   
108 N1-SpyCatcher-mi3 and  $\Delta$ N1-SpyCatcher-I53-50, to display more antigen to the  
109 surface of NPs based on the formation of isopeptide bond between SpyTag peptide  
110 and  $\Delta$ N1-SpyCatcher in vivo (Figure S2b, Supporting Information). 24-mers ferritin  
111 were self-assembled into a spherical particle and form an octahedral nanocage<sup>23</sup>.  
112 Computational designed and optimized mi3 NP protein with mutation of C76A and  
113 C100A from KDPG aldolases to escape the potential disulfide bond-mediated  
114 heterogeneity was dodecameric cage engineered scaffold with 60 total subunits  
115 multiply display its on surface of NPs<sup>17, 24</sup>. The I53-50 NPs was a computational  
116 designed icosahedral nanoparticle assembled with two components, 20 copies of  
117 trimeric I53-50A1.1PT1 and 12 copies of pentameric I53-50B.4PT1<sup>25</sup>.

118 Previous studies have manifested that immunization with RBD of SARS-CoV S

119 protein expressed in the mammalian cells could elicited higher potent neutralizing  
120 antibody responses in mice and provided completely protection following infection  
121 with SARS-CoV compared with those expressed in insect cells and E.coli <sup>26</sup>.  
122 RBD-SpyTag (residues 319–541) protein was firstly expressed by transient  
123 transfection method into HEK293F cells and purified by Ni-NTA affinity  
124 chromatography, and followed by SEC. As shown in Figure 1C and 1D, purified RBD  
125 -SpyTag was identified uniform and highly pure demonstrated by a clear single blot in  
126 SDS-PAGE and a single major peak in SEC chromatogram. As shown in Figure 1C  
127 and 1D,  $\Delta$ N1-SpyCatcher-NPs,  $\Delta$ N1-SpyCatcher-Ferritin NP,  $\Delta$ N1-SpyCatcher-mi3  
128 NP and  $\Delta$ N1-SpyCatcher-I53-50 NP were expressed in E.coli and purified by  
129 Ni-NTA affinity chromatography followed by SEC, and the high yield and production  
130 quality of protein could be observed also from the SDS-PAGE and SEC peak result.  
131 Further, with the preparation of precursor proteins in high quality produced, assembly  
132 of the RBD-conjugated nanoparticles, purified  $\Delta$  N1-SpyCatcher-Ferritin,  $\Delta$   
133 N1-SpyCatcher-mi3 and  $\Delta$ N1-SpyCatcher-I53-50A1.1PT1 proteins was performed.  
134 A 50  $\mu$ M subunit concentration of RBD-SpyTag was incubated with 8 times higher  
135 excess molar of  $\Delta$ N1-SpyCatcher-NPs overnight for in vitro bonding reaction, and  
136 then applied to SEC assay to separate out RBD monomers and unlinked nanoparticles.  
137 As shown in Figure. 1C RBD-conjugated Ferritin, mi3 and I53-50 NPs were verified  
138 through the single band and an uniformly increase of molecular weight (around 35  
139 kDa to 72 kDa) from reducing SDS-PAGE and further confirmed by peak forward  
140 shifts from the SEC assay (Figure 1D) , which suggested that RBD-SpyTag could  
141 completely conjugated with  $\Delta$ N1-SpyCatcher-NPs at a high efficacy and full reaction  
142 level. Collectively, we used the SpyTag-SpyCatcher system to guarantee a both  
143 flexible and high-efficiency production of SARS-CoV-2 RBD-conjugated  
144 nanoparticles.

145

146 **2.2. Structural characterization of SARS-CoV-2 RBD-conjugated**

147           **nanoparticles**

148           We next observe the structural characterization of RBD-conjugated nanoparticles  
149 by using negative stain electron microscopic (EM). As shown in Figure 2A, RBD was  
150 conjugated with Ferritin, mi3 and I53-50 nanoparticles and presented on the surface  
151 of monodispersed particles. As shown by the EM graphs, a burred exterior surface of  
152 nanoparticles could be observed among RBD-conjugated NPs, especially for  
153 RBD-Ferritin NP. The hydrodynamic diameters of RBD monomer,  $\Delta$   
154 N1-SpyCatcher-NPs and RBD-conjugated NPs were further measured by Dynamic  
155 Light Scattering (DLS). As displayed in Figure 2B, particle characteristic of both  
156 unconjugated NPs and RBD-conjugated NPs were validated and uniform distribution  
157 of particle sizes were rendered. Moreover, consistent with the results of negative stain  
158 EM, the hydrodynamic diameter of RBD-conjugated nanoparticles was larger than the  
159 unconjugated NPs from DLS.

160           In order to explore the physical stability of the nanoparticles to verify the  
161 compatibility of antigen and the nanoparticle platform,  
162 nano differential scanning fluorimetry (nanoDSF) was performed to RBD monomer,  
163  $\Delta$  N1-SpyCatcher-NPs and RBD-conjugated NPs, and detailed thermostability  
164 parameters were given (Figure 2B). A close  $T_{m1}$  of RBD and RBD-conjugated NPs  
165 primarily indicated that the overall structure of RBD upon the nanoparticle was not  
166 affected by the conjugation. The risen  $T_{m1}$  for mi3-NP after conjugation with RBD  
167 may be ascribed to RBD-buried unsatisfied exterior surface, which even strengthened  
168 the structural viability of covalent bond linking strategy for RBD with the  
169 nanoparticles. Except for melting temperatures, no aggregation was observed for RBD  
170 monomer, RBD-Ferritin NP and RBD-mi3 NP during the process of thermal  
171 denaturation (Figure 2B). Comparatively, RBD-I53-50 NP underwent aggregation  
172 under approximately 70°C, close to the aggregation temperature of empty I53-50 NP  
173 and significantly higher than the  $T_{m1}$  of the RBD monomer. The above results  
174 demonstrated that under general medicine or vaccine storage environment at 4°C, the  
175 designed conjugated vaccine could maintain a similar stability behavior as the RBD

176 monomer which highly benefited commercial production and distribution.

177

### 178 **2.3. In vitro antigenicity validation of SARS-CoV-2 RBD-conjugated** 179 **nanoparticles**

180 We next expressed and purified recombinant human ACE2 ectodomain and  
181 RBD-specific neutralizing antibody (CB6), and then characterized the antigenicity of  
182 RBD-conjugated NPs by detecting the binding affinity with the receptor and antibody.  
183 CB6 neutralization antibody was isolated from a COVID-19 convalescent patient and  
184 recognized an epitope that overlap with the hACE2-binding site of RBD, a critical  
185 character enabling a potential effect to neutralize the authentic SARS-CoV-2 virus<sup>27</sup>.  
186 ELISA profiles showed that RBD-SpyTag monomer and three RBD-conjugated NPs  
187 bound to hACE2 and CB6 antibody in a dose-dependent manner. Analogous to  
188 soluble RBD-SpyTag monomer, three RBD-conjugated NPs bound to purified hACE2,  
189 suggesting that the conformation of RBD monomer was retained on the conjugated  
190 nanoparticles (Figure 3A). However, the binding between three RBD-conjugated NPs  
191 and CB6 antibody was significantly higher than RBD-SpyTag monomer (Figure 3B).  
192 Bio-layer interferometry assay was then applied to further examine the binding  
193 kinetics of RBD-conjugated NPs. As illustrated in Figure 3B and 3D, the measured  
194 binding affinity constant (kD) of RBD monomer and two RBD-conjugated NPs,  
195 RBD-Ferritin NP and RBD-I53-50 NP, with hACE2 receptor were 4.34E-09, 1.74E-08  
196 and 1.00E-09 M. However, the dissociation was very slowly between RBD-mi3 NP  
197 and hACE2, and kD reached up to 1.0E-12 M, indicating RBD-mi3 NP showed an  
198 even higher antigenicity in comparison to RBD-Ferritin NP and RBD-I53-50 NP. The  
199 binding kinetics of RBD-conjugated NPs to CB6 antibody were also measured. The  
200 binding capability between three RBD-conjugated NPs and CB6 antibody were  
201 significantly stronger than RBD monomer (Figure 3C and 3D), suggesting that three  
202 RBD-conjugated NPs may showed a higher affinity to specific BCR targeting the  
203 RBD of SARS-CoV-2.

204

### 205 **2.4. Immunogenicity of RBD-conjugated nanoparticles in BALB/c mice**

206 To compared the immunogenicity of three RBD-conjugated NPs and soluble  
207 monomeric RBD, mice were immunized with 5  $\mu$ g monomeric RBD or corresponding  
208 weights of RBD-mi3 NP, RBD-Ferritin NP and RBD-I53-50 NP with equimolar RBD  
209 formulated with 50 % (v/v) AddaVax or SAS adjuvant at weeks 0, 2 and 4 (Figure  
210 4A). PBS was used as the negative group. As expected, after prime immunization,  
211 almost no binding antibody response was detected in groups immunized with  
212 monomeric RBD adjuvanted with both AddaVax and SAS. However, immunized with  
213 three RBD-conjugated NPs, RBD-Ferritin, RBD-mi3 and RBD-I53-50, formulated  
214 with AddaVax adjuvant elicited 71.8 to 168.4-fold higher binding antibody ( $ED_{50}$ :  
215  $10^{3.8\pm0.4}$ ,  $10^{3.9\pm0.2}$ ,  $10^{4.2\pm0.2}$ , respectively) than RBD ( $ED_{50}$ :  $10^{2.0}$ ). Analogous to the the  
216 Addvax adjuvant, immunized with RBD-Ferritin, RBD-mi3 and RBD-I53-50  
217 adjuvanted with SAS adjuvant induced virtually the same antigen-specific binding  
218 antibodies in mice ( $ED_{50}$ :  $10^{4.1\pm0.3}$ ,  $10^{4.0\pm0.2}$ ,  $10^{4.3\pm0.2}$ , respectively) after the prime  
219 immunization. Next, the RBD-specific antibody titers were substantially increased  
220 among groups immunized with monomeric RBD and three RBD-conjugated NPs in  
221 the following 1<sup>st</sup> boost and 2<sup>nd</sup> boost immunization. ELISA profiles showed that  
222 throughout the whole immunization three RBD-conjugated NPs induced significantly  
223 higher RBD-specific binding antibody compared to the monomeric RBD, while the  
224 titer levels among groups of RBD-conjugated NPs adjuvanted or groups between the  
225 two adjuvants were generally similar (Figure 4B). In order to explore the detailed  
226 immune response during immunization, we further evaluated the IgG subtype of the  
227 antibody elicited and the results showed that a similar trend of antibody titer among  
228 different immunization groups could be observed regardless of subtypes of IgG.  
229 Moreover, the titer ratio of IgG1:IgG2a among groups were greater than 1 throughout  
230 the whole immunization process, indicating a Th2-favored antibody response <sup>28</sup>  
231 (Figure 4B).

232 Besides the intensity of antibody production, the neutralizing capability of  
233 generated antibody would be another critical factor impacting the quality of  
234 immunization. Thus, for further evaluation of immunogenicity of RBD-conjugated  
235 NPs, serum competition assay through BLI was performed. Sera of mice immunized



236 with antigen adjuvanted with after 2<sup>nd</sup> boost was retrieved and mixed within each  
237 group for a general evaluation. After serial dilution, sequentially-diluted sera were  
238 applied to the RBD captured on the biosensors for blocking. It was observed that sera  
239 from RBD-conjugated NPs groups can priorly hinder the binding of ACE2 and CB6  
240 antibody to RBD under each dilution level in comparison with the RBD monomer  
241 (Figure 4C). As the binding signals were recorded, the non-competing binding curve  
242 height  $R_o$  and competing binding curve of each dilution level  $R_c$  could be used for  
243 quantitative analysis. The heatmap of relative competition level of mice sera further  
244 displayed that competitive levels of RBD-conjugated NP groups were 4- to 16-fold  
245 stronger to the monomeric RBD group (Figure 4D). And as the copies of RBD  
246 presented on the surface increased, a stronger competition could be observed when  
247 comparing the RBD-Ferritin NP with RBD-I53-50/mi3 NPs. A stronger relative  
248 competition level may indicate a more lasting occupation of RBD of the spike protein  
249 on the virus intruding and hinder its binding with ACE2 to prevent cell infection,  
250 which would further confirmed by neutralizing assays.

251 Neutralization antibody titers were determined in vitro using SARS-CoV-2  
252 pseudovirus and authentic SARS-CoV-2 virus neutralizing assays. The neutralization  
253 titer of sera collected with the RBD-conjugated nanoparticles formulated with  
254 AddaVax adjuvant after the 2<sup>nd</sup> boost immunized mice was ~10- to 120-fold greater  
255 than that of sera from the monomeric RBD control group during SARS-CoV-2  
256 pseudovirus-based assay. Analogical result was also observed when immunized with  
257 antigen formulated with SAS adjuvant (Figure. 5A). Therefore, we further performed  
258 authentic SARS-CoV-2 virus to detected the neutralization activity of sera by method  
259 of cytopathic effect (CPE) evaluation and focus reduction test. As shown in Figure.  
260 5B, 90 % focus reduction neutralization antibody titers ( $FRNT_{90}$ ) of post-2<sup>nd</sup> boost  
261 sera from mice immunized with RBD-Ferritin NP, RBD-mi3 NP and RBD-I53-50 NP  
262 formulated with AddaVax adjuvant ( $FRNT_{90}$ :  $10^{4.1\pm0.5}$ ,  $10^{4.0\pm0.6}$ ,  $10^{4.1\pm0.3}$ , respectively)  
263 was ~10- to 40-fold higher than monomeric RBD ( $FRNT_{90}$ :  $10^{2.1\pm0.8}$ ). As was  
264 similar to AddaVax, three RBD-conjugated nanoparticles adjuvanted with SAS also  
265 showed significantly higher  $FRNT_{90}$  than RBD monomer (Figure 4B). Otherwise we

266 compared the difference of neutralization activity of sera from all groups after each  
267 immunization procedure according the CPE-based microneutralization assay. Results  
268 manifested that after the first prime, little neutralizing effect could be observed among  
269 all groups. As the immunization procedures progressed, neutralizing effect of sera  
270 samples of groups from RBD-conjugated NPs was significantly overwhelming the  
271 monomeric RBD group in regardless of adjuvants used. Specially, comparative serum  
272 neutralizing activity could be observed after 1<sup>st</sup> boost for the RBD-conjugated groups  
273 while an equal strength of neutralization was postponed to post-2<sup>nd</sup> boost for  
274 monomeric RBD group, during which the neutralizing activities of nanoparticle  
275 groups were nearly 10-fold higher. It was interesting to point out that the  
276 RBD-Ferritin NP showed a relatively inferior effect compared to the other two  
277 nanoparticles when we made a parallel contrast between groups, which was in  
278 accordance to the competition assay.

279

## 280 **2.5. Cellular reponse during the immunization**

281 To explore whether a difference in immune cell level of immune response to  
282 antigen manipulate the above effect and determine the T cell immune response  
283 elicited by RBD-conjugated NPs, analysis of germinal centers (GCs) B cells, T  
284 follicular helper (Tfh) cells and immune cells containing intracellular cytokine was  
285 performed. Compared to monomeric RBD, analysis of responding cells in draining  
286 lymph nodes following a 2<sup>nd</sup> boost immunization shown that no significant difference  
287 was observed in Tfh and GC cell responses when immunized with three  
288 RBD-conjugated NPs (Figure S3A and 3B, Supporting Information). In addition,  
289 consistent with the RBD-dimer results as previously reported <sup>16</sup>, compared with  
290 monomeric RBD immunized mice, no substantially increase of T cell responses of  
291 collected draining lymph nodes and spleen was detected by flow cytometry in  
292 RBD-conjugated NPs immunized mice (Figure S3C and S3D, Figure S4, Supporting  
293 Information).

294

## 295 **3. Discussion**

296 With the worldwide collaboration in SARS-CoV-2 research, various vaccine  
297 candidates were raised and validated in preclinical or clinical trials <sup>29-32</sup>. And to  
298 enhance the immunogenicity of antigen used in vaccine, strategies including  
299 live-virus platform <sup>33-34</sup>, viral vector vaccine using vesicular stomatitis virus <sup>35</sup> or  
300 adenovirus <sup>36</sup>, lipid nanoparticle-encapsulated mRNA <sup>37</sup>, or whole inactivated virus  
301 <sup>38-39</sup> were adopted, among which the multivalent presentation of antigen on  
302 nanoparticle protein was regarded as one of the most rapidly-developing method for  
303 vaccine design <sup>40-41</sup>. However, the increased structural redundancy during the de novo  
304 design of antigen constructed on the multimeric component pulled apart the gap  
305 between well-designed blueprint structure and the actual production <sup>42</sup>. Hence, we  
306 reported the design of RBD-based nanoparticles using covalent bond linking strategy  
307 as the example for a potent method for rapid antigen-nanoparticle design.

308 As the global awareness of the urgent need of fast-responding vaccine  
309 development grew under the pandemic, a delicate selection of antigen able to elicit  
310 competent intensity of neutralizing antibody was demanded. Thus, spike protein as  
311 the major viral membrane protein became the focused antigen candidate for vaccine  
312 design, leading to selection of different protein subsection used (full ectodomain S  
313 protein, S1 segment and RBD) based on the co-structure and functional mate, ACE2 <sup>8</sup>,  
314 <sup>13, 43</sup>. Despite a full display of available antigenic site, full length S protein bear  
315 uncertainty of prospective immune response due to increasing evidence of versatile  
316 mutations <sup>44</sup>, unpredictable presenting efficacy of neutralizing epitope and  
317 antibody-dependent enhancement (ADE) effect <sup>45</sup>. The shortening of ectodomain of  
318 spike protein to S1 maintains a balanced characteristic between full length protein and  
319 RBD domain but still carried the inherited shortage from the full-length spike protein  
320 <sup>46</sup>. As the co-structure of RBD and ACE2 has been elucidated, growing attention was  
321 put on the RBD as primary antigen for vaccine design and variable strategies were  
322 adopted to enhance the immunogenicity including dimerization, nanoparticlization or  
323 simple combined use of adjuvant <sup>12-13</sup>. Among all the strategies, multivalency of  
324 antigen and enlargement of antigen size gained most effort due to that increased  
325 antigen size and antigen saturation of BCR prolongs the antigen-presentation retention

326 and foster the recognition of antigenic epitope from the immunogen <sup>47</sup>. To achieve  
327 multimeric display of RBD existed as monomer, necessary component was introduced  
328 to the original RBD sequence to form commutative bond between RBDs or to add  
329 additional scaffold to initiate multimerization, which required skilled structure-guided  
330 modification on corresponding antigen and iterations of ideal-to-real test production <sup>31</sup>,  
331 <sup>48</sup>. The two time-costing prerequisites for fine design of antigen-nanoparticle would  
332 expose disadvantages during emergent spread of infectious diseases, especially under  
333 pandemic. Therefore, we validated the utilization of covalent bond linking strategy  
334 during rapid development of SARS-CoV-2 vaccine and confirmed the viability by  
335 comprehensive evaluation.

336 Ascribing to separation of the expression of antigen RBD and nanoparticles used  
337 for antigen capture, the construction and production of proteins could be achieved in  
338 different optimal expression systems (Figure 1B). Later the covalent bond linking  
339 would be performed easily by incubation of RBD-SpyTag and  $\Delta$ N1-SpyCatcher-NPs,  
340 yielding fully multivalent RBD-conjugated NPs with high structural uniformity and  
341 stability, and little sacrifice in assembling efficiency (Figure 1C and 1D, Figure 2).  
342 Both monomer RBD and RBD-conjugated NPs underwent further antigenicity  
343 inspection and results showed that multivalency RBD-conjugated NPs exhibited  
344 stronger affinity to receptor ACE2 and neutralizing antibody CB6 (Figure 3). We  
345 immunized Balb/C mice with monomer RBD and RBD-conjugated NPs adjuvanted  
346 with AddaVax or SAS. Serum anti-RBD antibody titers of RBD-conjugated NPs were  
347 significantly higher than monomer RBD (Figure 4A and 4B) regardless of adjuvant  
348 used, indicating the achieved target of nanoparticle design. Neutralizing assay of  
349 pseudovirus or authentic SARS-CoV-2 virus proved that elicited neutralizing antibody  
350 titers of RBD-conjugated NPs were also far away higher than monomer (Figure 5),  
351 which could be explained by the competition assay of immunized mice sera to ACE2  
352 or CB6 antibody (Figure 4C and 4D). Stronger competition behavior from higher  
353 dilution level of sera guaranteed a more perfect protection of recognition by RBD  
354 from intruding virus. Moreover, it seemed to be creditable that with the increase of

355 valency of RBD upon the nanoparticle surface, a more favorable immunization effect  
356 could be induced, as we compared 24-mer RBD-Ferritin NP with the other 2  
357 nanoparticles (Figure 4C and 4D, Figure 5C).

358 Here, we reported three RBD-based nanoparticle design using a universal strategy  
359 in vaccine development and validated three different nanoparticles platform for future  
360 need in rapid and general vaccine design. It's completely viable for replacement of  
361 RBD to other antigens from potential risky pathogen as the immunogen core. The  
362 independence of antigen screening and expression, nanoparticle scaffold selection,  
363 particle assembly and immunogenicity validation would bring helps to researchers  
364 devoted to contribute to vaccine development without setting an excess threshold of  
365 required structural information and experimental skills, and to manufacturer in  
366 commercial production due to a high yield of protein components and shortening  
367 process in upper-stream research and development, not only for the current pandemic  
368 but for the future battle with unknown pathogens.

369

#### 370 4. Experimental Section

##### 371 **Cells and viruses**

372 Vero-E6 (clone E6) and Vero cells were kidney epithelial cells from African  
373 green monkey and purchased from ATCC. The HEK293T cell is a human embryonic  
374 kidney epithelial cell line and obtained from ATCC. The HEK293F cells were  
375 purchased from Life Technologies and maintained in Union 293 medium  
376 (Union-Biotech) at 37 °C with 5% CO<sub>2</sub> and shaking at 120 rpm. The HEK293T cell  
377 expressing human angiotensin-converting nzyme 2, HEK293T-hACE2, is deposited  
378 in our lab. All adherent cells were grown in Dulbecco's modified Eagle's medium  
379 (DMEM) supplemented with 10% fetal bovine serum (FBS) and 1%  
380 penicillin-streptomycin at 37 °C with 5% CO<sub>2</sub>. All cell lines were confirmed free of  
381 mycoplasma contamination. In this study, both SARS-CoV-2 strains we used were  
382 isolated from COVID-19 patients in Guangzhou (Genbank: MT123290 and GISAID:  
383 EPI\_ISL\_413859).

384

385 **Mice**

386 Specific pathogen-free (SPF) six to eight weeks old female BALB/c mice were  
387 obtained from the Beijing Vital River Laboratory Animal Technology Co., Ltd. All  
388 experimental animal studies were approved by the ethics committee of Sun Yat-sen  
389 University Cancer Center (approve number: L102042020000A).

390

391 **Gene synthesis and plasmid construction**

392 The SARS-CoV-2 RBD (residue 319-541, GenBank: MN908947) construct for  
393 preparation of RBD-based nanoparticle vaccine were human codon-optimized and  
394 synthesized by Genscript, and further cloned into mammalian expression vector  
395 VRC8400 with a N-terminal Kozak consensus sequence, signal peptide for protein  
396 secretion and a C-terminal octa-histidine tag followed by a 13-residues SpyTag<sup>18</sup>  
397 using the BamHI restriction sites. The SARS-CoV-2 RBD construct for ELISA assay  
398 was basically same as the above but without the 13-residue SpyTag. The human  
399 ACE2 (residue 19-615, GenBank: NM\_021804.2) was synthesized by Genscript and  
400 cloned into VRC8400 with a N-terminal Kozak consensus sequence and signal  
401 peptide and with a C-terminal octa-histidine tag.

402 The IgG heavy and light chain variable genes of CB6 mAb (GenBank: MT470196  
403 and MT470197) were human codon-optimized and synthesized by Genscript and  
404 cloned into antibody expression vectors.

405 The  $\Delta$ N1-SpyCatcher-mi3 construct (GenBank: MH425515) with mutations C76A  
406 and C100A based on pentameric I3-01(60-mer)<sup>17,24</sup> was E. coli codon-optimized and  
407 synthesized by Genscript and cloned into a modified pET28a+ vector with a  
408 N-terminal hexahistidine tag. The  $\Delta$ N1-SpyCatcher was fused to the N-terminal  
409 trimeric Ferritin (24-mer)<sup>23</sup> or trimeric I53-50A1.1PT1 (60-mer)<sup>25</sup> using the (GGG)<sub>4</sub>  
410 spacer, and E. coli codon-optimized and synthesized and then cloned into a modified  
411 pET28a+ vector with a N-terminal hexahistidine tag or a C-terminal hexahistidine tag,  
412 respectively, by Genscript.

413 The I53-50B.4PT1 was codon-optimized and synthesized and then cloned into a

414 modified pET28a+ vector with a C-terminal hexahistidine tag by Genscript.

415

### 416 **Protein expression and purification in HEK293F cells**

417 The expression plasmid was transformed into DH5a competent cell for plasmid  
418 DNA extraction using the NucleoBond Xtra Maxi kit according to the manufacture  
419 protocol. The SARS-CoV-2 RBD monomer and hACE2 proteins were produced in  
420 HEK293F cells. The HEK293F cells were cultured in Union 293 medium at 37 °C,  
421 80-90% humidity, 5% CO<sub>2</sub> with rotation at 120 rpm for expansion. Then cells were  
422 transiently transfected with 2mg expression plasmid per 1 liter using the  
423 Polyethylenimine (PEI) MAX (Polysciences) at a density of 1.0 x 10<sup>6</sup> cells/ml in  
424 fresh Union 293 medium. After 5 days culture, the cell culture was collected and  
425 centrifuged at 4°C, 8000 g for 1h. Collected supernatant was further filtered using  
426 Steritop (0.22 µm pore size; Guangzhou Jet Bio-Filtration Co., Ltd) and concentrated  
427 to 1/10 volume using tangential flow filtration system (10 kD retention molecular  
428 weight, Millipore). Then concentrated supernatant was purified by immobilized  
429 metal-affinity chromatography with Ni-NTA resin (Roche) stocked in WET FRED  
430 gravity flow columns (IBA) and beads were eluted with buffer composed of 50 mM  
431 HEPES, pH 7.3, 300mM imidazole and 300 mM NaCl. The eluate was concentrated  
432 and further purified with size exclusion chromatography using Superose 6 Increase  
433 10/300 GL gel filtration column (GE Healthcare) in a buffer composed of 50 mM  
434 HEPES, pH 7.3 and 300 mM NaCl. Fractions of the target peak were and pooled and  
435 concentrated using centrifuge tubes (10KDa MWCO, Millipore), and followed by  
436 store in 4 °C for further use.

437 CB6 antibody was expressed and purified as previously reported<sup>27</sup>. Briefly, the  
438 plasmids encoding the IgG heavy and light chain gene were transiently transfected into  
439 HEK293F cells at a ratio of 5:6. The supernatant of culture was collected 5 days after  
440 transfection, centrifuged and purified by affinity chromatography with protein A resin  
441 (Genscript), and subjected to desalt in a composed buffer 50 mM NaPO<sub>4</sub>, 150 mM  
442 NaCl, pH 7.3 using HiTrap Desalting column (GE Healthcare) with AKTA pure  
443 chromatography system (GE Healthcare).

444

#### 445 **Protein expression and purification in E. coli**

446 The modified pET28a+ expression plasmid of  $\Delta$  N1-SpyCatcher-mi3,  $\Delta$   
447 N1-SpyCatcher-Ferritin,  $\Delta$  N1-SpyCatcher-I53-50A1.1PT1 and I53-50B.4PT1 was  
448 transformed into Rosetta™ (DE3) competent cells (TIANGEN). After incubation for  
449 overnight at 37 °C on TB-agars culture plate supplemented with 50 mg/mL  
450 kanamycin and 33 mg/mL chloramphenicol, a single positive colony was selected and  
451 inoculated into 10 mL TB medium in the presence of 50 mg/mL kanamycin and 33  
452 mg/mL chloramphenicol and was grown overnight at 37 °C with shaking at 220 rpm.  
453 The culture was added to the 3L baffled triangle shake flasks containing 1 L TB  
454 medium and 50 mg/mL kanamycin, and grown at 37 °C with shaking at 150 rpm.  
455 When OD600 value of the culture reached up to 0.6~0.8, isopropylthiogalactoside  
456 (IPTG) was added to a final concentration of 1 mM for induction at 20 °C for 16-20 h  
457 with shaking at 150 rpm. The bacterial cultures were harvested and centrifuged at  
458 20 °C, 2450 g for 15 min

459 For  $\Delta$ N1-SpyCatcher-mi3 purification, cell pellets were resuspended in lysis  
460 buffer (250 mM Tris, pH 8.5, 300 mM NaCl, 30 mM imidazole, 1  $\mu$ M DNases, 0.75%  
461 CHAPS, 5 mM MgCl<sub>2</sub> and EDTA-free protease inhibitor cocktail [Roche]), and  
462 lysed with high pressure cell homogenizer (Union-Biotech) at a pressure of 800 MPa.  
463 The suspensions were centrifuged for supernatant collection, filtered with Steritop  
464 (0.22  $\mu$ m pore size), and purified with the gravity flow columns containing Ni-NTA  
465 resin. Beads were eluted with 50 mM HEPES, pH 8.0, 300 mM NaCl, 300 mM  
466 imidazole and 0.75% CHAPS, and the elution was concentrated to 1mL and loaded  
467 onto the size exclusion chromatography using Superose 6 Increase 10/300 GL gel  
468 filtration column (GE Healthcare) pre-equilibrated with 50 mM HEPES, pH 8.0 and  
469 300 mM NaCl. Peak fractions were identified with  
470 SDS-polyacrylamide gel electrophoresis (PAGE) analysis to determine whether target  
471 protein was collected. After a concrete confirmation of purity and yield of protein, the  
472 fractions were pooled, concentrated, and stored at 4 °C.



473 For  $\Delta$  N1-SpyCatcher-Ferritin and  $\Delta$  N1-SpyCatcher-I53-50A1.1PT1 proteins  
474 purification, cell pellets were resuspended in lysis buffer (50 mM HEPES, pH 7.3,  
475 300 mM NaCl, 30 mM imidazole, 1mM DTT, 0.75% CHAPS, 1  $\mu$ M DNases, 5  $\square$  mM  
476  $MgCl_2$  and EDTA-free protease inhibitor cocktail [Roche]). Purification was similar  
477 as the above instead of the elution buffer used (50 mM HEPES, pH 7.3, 300 mM  
478 NaCl, 300 mM imidazole, 1mM DTT and 0.75% CHAPS), and equilibration buffer  
479 for SEC (50 mM HEPES, pH 7.3 and 300 mM NaCl).

480 Endotoxin of all purified proteins was removed with ToxinEraser<sup>TM</sup> Endotoxin  
481 Removal Kit (Genscript) in accordance to the manufacturer's instruction. The  
482 remnant endotoxin was identified with ToxinSensor<sup>TM</sup> Chromogenic LAL Endotoxin  
483 Assay Kit (Genscript) and no more than 0.1 EU/mL of endotoxin was detected.

484

#### 485 **Preparation of RBD-conjugated nanoparticles**

486 To assemble the RBD-conjugated nanoparticles, RBD-SpyTag should be  
487 incubated with  $\Delta$ N1-SpyCatcher-NPs to form a covalent peptide bond in between due  
488 to an automatic reaction of SpyTag-SpyCater system (Banerjee and Howarth, 2018;  
489 Bruun et al., 2018). Purified  $\Delta$  N1-SpyCatcher-Ferritin or  $\Delta$   
490 N1-SpyCatcher-I53-50A1.1PT1 protein presented at a subunit concentration of 50  $\mu$ M  
491 were incubated in a 1:8 molar excess ratio with RBD-SpyTag for overnight at room  
492 temperature buffered with 50 mM HEPES, pH 7.3, 300 mM NaCl. For  $\Delta$   
493 N1-SpyCatcher-mi3, 50  $\mu$ M subunit of concentration of protein was mixed in a  
494 1:8 molar excess ratio with RBD-SpyTag for overnight at room temperature buffered  
495 with 50 mM HEPES, pH 7.5, 300 mM NaCl, 5% glycerol. In order to separate the  
496 conjugated nanoparticles with the empty-NPs and monomer RBD, all incubated  
497 substrates were applied to size exclusion chromatography using Superose 6 Increase  
498 10/300 GL gel filtration column pre-equilibrated with 50 mM HEPES, pH 7.3, 300  
499 mM NaCl. Fraction were collected for SDS-PAGE analysis. The protein of interest  
500 was selected, concentrated and stored at 4  $^{\circ}$ C.

501

## 502 **SDS-PAGE analysis**

503 SDS-PAGE was performed as previously described <sup>49</sup>. Briefly, five micrograms  
504 of purified protein by added the 5x loading buffer were heated at 95 °C for 5 min, and  
505 loaded on 12 % Tris-glycine gels for 30 min at 300 V. Gels were stained with  
506 coomassie brilliant blue (Beyotime, China) and destained with 30% methanol ,10%  
507 glacial acetic acid in double distilled water and subjected to film by ChemiDoc  
508 system (BioRad).

509

## 510 **Dynamic light scattering**

511 DLS was carried out to characterize the hydrodynamic diameter and  
512 polydispersity index of RBD-conjugated nanoparticles and individual nanoparticles  
513 using Zetasizer Ultra instrument (Malvern Panalytical). Briefly, purified proteins were  
514 centrifuged at 16,250 g, 4 °C for 10 min to remove any aggregates, and diluted to at a  
515 concentration of 0.5 mg/mL in PBS and loaded onto the disposable solvent resistant  
516 micro cuvette.

517 The particle distribution of the purified protein was determined by measuring the  
518 intensity of the light scattered by the sample using the avalanche photodiode detector  
519 placed at a measurement angle of 173° at 25 °C. Each sample was measured in  
520 triplicate and the average values of the hydrodynamic diameter and polydispersity  
521 index of the sample were recorded and analyzed using the manufacturer's software  
522 (Malvern Panalytical).

523

## 524 **Negative stain electron microscopy**

525 Approximately 5 µL aliquot of purified nanoparticle at a concentration of 0.05-2  
526 mg/mL was applied to freshly glow-discharged 300-mesh copper grids and incubated  
527 for 1 min. Excess liquid were blotted with filter paper. The grids were washed twice  
528 by double distilled water and blotted, and then negatively stained freshly 2 % (w/v)  
529 uranyl acetate for 45s, and followed by air dried. Grids were imaged with FEI Tecnai  
530 T12 transmission electron microscope (FEI, USA) operating at 120 kV. The digital

531 micrographs were obtained at 150,000x magnification.

532

### 533 **Nano differential scanning fluorimetry**

534 NanoDSF Systems were conducted to measure the thermostability and  
535 aggregation of purified protein using Prometheus NT.48 instrument  
536 (NanoTemper Technologies). A 10  $\mu$ L aliquot of sample diluted to a concentration of  
537 0.5 mg/mL were applied to quartz capillary cassette and placed into card slot. The  
538 scan temperature was increased linearly starting from 20.0  $^{\circ}$ C to 95  $^{\circ}$ C at a scan rate of  
539 1  $^{\circ}$ C. The thermal transition midpoint ( $T_m$ ) and aggregation results from start to finish  
540 (Tagg) were reported and analyzed in PR.ThermControl software  
541 (NanoTemper Technologies). Three replicates are measured for each sample.

542

### 543 **Enzyme-linked immunosorbent assay**

544 ELISA assay was performed to examine the binding ability of purified protein to  
545 the receptor ACE2 and SARS-CoV-2 RBD-specific CB6 Antibody. Purified RBD  
546 monomer and RBD-conjugated NPs was diluted to a concentration of 1  $\mu$ g/mL and  
547 precoated on 96-well microplates (Corning) (100  $\mu$ L/well) in triplicate overnight at  
548 4  $^{\circ}$ C. The plates were washed three times with PBS with 0.05 % Tween 20 (PBS-T),  
549 and blocked with ELISA blocking buffer (2 % gelatin, 5 % casein and 0.1 % proclin  
550 30 in PBS) for 1 h at 37  $^{\circ}$ C. The plates were then incubated with sequentially 1:5  
551 diluted ACE2 starting from  $5 \times 10^{-4}$  ng/mL to  $10^{-2}$  ng/mL in ELISA blocking buffer.  
552 After 1 h incubation, the plates were washed with PBS-T for five times, and 100  $\mu$ L  
553 hACE2-specific rabbit antibody (Sino Biological Inc) diluted at a ratio of 1:5000 was  
554 added to wells at 37  $^{\circ}$ C for 1 h. The plates were washed with PBS-T 5 times and a  
555 1:5000 dilution of HRP-conjugated goat anti-rabbit IgG antibody (Promega) was  
556 added for 45 min at 37  $^{\circ}$ C. After the final round of wash to remove all disassociated  
557 antibody, substrate 3,3',5,5'-Tetramethylbenzidine (TMB, Sangon Biotech) was added  
558 to generate chromogenic reaction for 15 min at room temperature, and the reaction  
559 would be suspended by a followed addition of 2M  $H_2SO_4$ . The well-absorbance at 450  
560 nm and 630 nm was immediately recorded by SpectraMax Plus plate reader

561 (Molecular Devices, USA).

562 As for the assay of CB6 antibody binding, the coating, incubating and  
563 chromogenic reaction generating were similar to the ACE2 assay instead of that  
564 primary antibody binding to antigen was not required and that HRP-conjugated goat  
565 anti-human IgG antibody (Promega) would be used as the secondary antibody to  
566 detect binding of CB6 antibody to the antigens.

567

### 568 **Bio-layer Interferometry**

569 BLI analysis were performed on an Octet Red 96 (Fortebio) instrument at 30 °C  
570 with shaking at 1000 rpm. Signals were collected at a standard frequency as default  
571 (5.0 Hz).

572 **Kinetic assay:** Firstly, the Streptavidin (SA) biosensors (Fortebio) were pre-incubated  
573 in PBS (ThermoFisher) containing 0.05 % Tween 20 (Sigma-Aldrich), the assay  
574 buffer used throughout the whole procedures, for 15 minutes. To couple the RBD  
575 protein on the biosensors, EZ-link-Sulfo-NHS-biotin biotinylation kit (ThermoFisher)  
576 was used to biotinylate the RBD/ACE2/CB6 antibody in the following of the  
577 instruction as below.

578 Step1: Calculation of the amount of biotinylation agent used

579 1. Calculate millimoles of biotin reagent to add to the reaction for a 20-fold molar  
580 excess:

$$\text{mL protein} \times \frac{\text{mg protein}}{\text{mL protein}} \times \frac{\text{mM protein}}{\text{mg protein}} \times \frac{20 \text{ mM Biotin}}{\text{mM protein}} = \text{mM Biotin}$$

581 20 = Molar fold excess of biotin

582 2. Calculate microliters of 10 mM biotin reagent solution to add to the reaction:

$$\text{mM Biotin} \times \frac{1,000,000 \mu\text{L}}{\text{L}} \times \frac{\text{L}}{10 \text{ mM}} = \mu\text{L Biotin}$$

583

584 Step2: Biotinylation

585 Add the calculated amount of 10 mM biotin reagent into the RBD/ACE2/CB6  
586 protein in PBS (5 mg/mL, 200  $\mu$ L) and incubated the reaction system at room  
587 temperature for 30 minutes.

588 Step3: Desalting

589 Equilibrate the desalting column PD-10 (GE Pharmacia) with 10 mL of PBS. After  
590 the equilibration, the reaction solution would be added in the column and then washed  
591 and eluted with 400  $\mu$ L PBS separately.

592 To perform kinetic assay, after 60 s baseline, ACE/CB6-biotin protein diluted with the  
593 buffer was captured on the SA sensor at 2  $\mu$ g/mL for 120 s. Then 2 fold-diluting  
594 RBD-copy molar concentrations of RBD monomer or different RBD-conjugated NPs  
595 were associated to the biosensor for 180 s, followed by a 300 s disassociation and 3  
596 rounds of regeneration with 10 mM Glycine pH 1.5. The curve data was analyzed by  
597 ForteBio data analysis software. Raw curves aligned at association were adjusted with  
598 baseline signals before a 1:1 binding model fitting was performed. Then a global fit to  
599 all binding curves was conducted to render overall kinetic parameters (kD, kon, kdiss  
600 etc.)

601 **Serum competition assay:** Mice serum from AddaVax-adjuvanted immunization  
602 group harvested after 2<sup>nd</sup> boost were collected and equal volume (5  $\mu$ L) of sera from  
603 each mouse within the same immunogen group was mixed together in representative  
604 of overall characteristic of the group. To perform the competition assay, RBD-biotin  
605 protein was captured on the biosensor as the above at 5  $\mu$ g/mL. Then to saturate the  
606 RBD, 2 fold-diluting mice sera mixtures from each group and control PBST were  
607 loaded to the biosensor for 300 s. After the end of sera loading, 400 mM ACE2 or  
608 CB6 antibody were associated to the biosensors for 300 s to detect the competitive  
609 binding signal under the saturation of each dilution level of mice sera. Sensors were  
610 also regenerated with 10 mM Glycine pH 1.5. Real-time signal data was collected and  
611 the competition behavior was displayed by the ACE2/CB6 binding signal of different  
612 curves. Binding signal data were retrieved from curve, Ro represented the saturated  
613 non-competing binding curve height and Rc represented saturated competing binding  
614 curves of each dilution level. Relative competition levels of each serum dilution level  
615 could be calculated as  $(R_o - R_c) / R_c$ .

616

617 **SARS-CoV-2 pseudovirus production**

618 The SARS-CoV-2 pseudovirus were produced as previously described<sup>50</sup>, with  
619 some modification. Briefly, gene encoding SARS-CoV-2 S (GenBank: QHU36824.1)  
620 with a 19-amino-acids deletion in C-terminal was human codon-optimized and cloned  
621 into the expression vector pCMV14-3×Flag, a generously gift from Zhaohui Qian,  
622 Chinese Academy of Medical Sciences. HEK293T cells were co-transfected with the  
623 plasmids of PsPAX2, pCMV14-SARS-CoV-2 S ΔCT-3×Flag and pLenti-GFP at a  
624 ratio 1:2:1 using PEI-MAX (mentioned above). After 5 hours, the supernatant was  
625 replaced with fresh DMEM supplemented with 10% FBS. Sixty hours  
626 post-transfection, the supernatant containing SARS-CoV-2 pseudovirus were  
627 harvested and centrifuged at 4 °C, 3000 g for 10 min to remove cell debris, followed  
628 by a filter process with Steritop (0.45 μm pore size,  
629 Guangzhou Jet Bio-Filtration Co., Ltd). Sterile PEG-8000 solution was added to the  
630 clarified supernatants and the solution was incubated for 1 hour at 4 °C. The mixture  
631 was then centrifuged, concentrated, and resuspended with DMEM for final collection  
632 of viruses. The storage of virus was at -80 °C.

633

#### 634 **BALB/c mice immunization**

635 Forty-five 6-8 weeks-old female BALB/c mice were purchased from the Beijing  
636 Vital River Laboratory Animal Technology Co., Ltd, and arbitrarily divided into 9  
637 groups. Before immunization, purified immunogen was diluted with PBS and gently  
638 formulated with an equal volume of AddaVax™ adjuvant (InvivoGen) or Sigma  
639 Adjuvant System (SAS, Sigma), and incubated overnight to achieve full absorption of  
640 antigen upon the surface of adjuvant particles at 4 °C with shaking at 40 g. Each  
641 group of mice received three immunizations at weeks 0, 2 and 4 via a subcutaneous  
642 route. The immunization dose was 5 μg of RBD monomer, or corresponding weights  
643 of RBD-conjugated nanoparticle immunogens containing equal molar of RBD as the  
644 monomers which were RBD-mi3 (9.51 μg), RBD-Ferritin (9.34 μg) and RBD-I53-50  
645 (11.91 μg). PBS were served as a negative control. Blood samples were harvested 10  
646 days following each immunization, and were placed at 37 °C for 30 min to reach  
647 ample coagulation. Then blood samples were centrifuged at 16,250 g, 4 °C for 10 min

648 and the upper layer serum was gently extracted, heat-inactivated at 56 °C for 30 min  
649 to deactivate the complement factors and pathogens, and then stored at -20 °C for  
650 future analysis.

651

## 652 **Serum ELISA**

653 1 µg/mL RBD monomer without SpyTag in PBS was precoated on 96-well  
654 maxiSorp ELISA microplates (Corning) overnight at 4 °C. Plates were blocked with  
655 ELISA blocking buffer for 1 h at 37 °C. Mouse serum samples were 5-fold  
656 sequentially diluted with blocking buffer starting at 1:50, and were added to the  
657 coated plates, and incubated at 37 °C for 1 h. After incubation, the plates were washed  
658 with PBS-T five times and added with a 1:5000 dilution of HRP-conjugated goat  
659 anti-mouse IgG antibody (Promega) in blocking buffer at 37 °C for 45 min. For  
660 analysis of RBD- specific IgG isotype titers, a 1:5000 dilution of HRP-conjugated  
661 goat anti-mouse IgG1 and IgG2a antibody was incubated at this step. Plates were  
662 washed, colored by TMB, and quenched with H<sub>2</sub>SO<sub>4</sub>. The absorbance at 450 nm and  
663 630 nm of each well was immediately determined by SpectraMax Plus plate reader  
664 (Molecular Devices, USA). Results were plotted and fitted by GraphPad Prism 8 and  
665 EC<sub>50</sub> value were calculated using 4-parameters nonlinear regression fitting from  
666 fitted curve.

667

## 668 **Pseudovirus-based neutralization assay**

669 Pseudovirus-based neutralization assay was performed to evaluate the  
670 neutralization ability of the sera by immunized mice. In brief, approximately 1.75x10<sup>4</sup>  
671 HEK293T-hACE2 cells were seeded onto 96-well culture plates overnight at 37 °C in  
672 5 % CO<sub>2</sub>. Sera were 4-fold serially diluted with complete DMEM medium starting at  
673 1:20, and pre-incubated with an equal volume of pseudovirus of SARS-CoV-2 at  
674 37 °C for 2 h. The mixtures were then added to the HEK293T-hACE2 cells for  
675 infection. After 2 hours incubation, the mixtures were replaced with fresh DMEM  
676 medium containing 2 % FBS and 1 % penicillin and streptomycin, and incubated for  
677 48 hours at 37 °C, 5 % CO<sub>2</sub>. Wells treated with only medium or virus without

678 incubation with serum were set as negative control and positive control in each plate,  
679 respectively. Afterwards, the cells were lysed with lysis buffer and luciferase activity  
680 was immediately measured by dual-glo luciferase assay system (Promega). The  
681 inhibition rate was calculated as (sera signals – blank control signals)/ (virus signals –  
682 blank control signals) \* 100 %. The 90 % neutralization antibody titers (NT<sub>90</sub>) were  
683 determined using 4-parameter s nonlinear regression fitting from fitted curve using  
684 GraphPad Prism 8.

685

### 686 **Authentic SARS-CoV-2 virus-based neutralization assay**

687 All of microneutralization assay for authentic SARS-CoV-2 virus we used in this  
688 study were performed in a BSL-3 facility. Two methods, the authentic SARS-CoV-2  
689 virus-induced cytopathic effect (CPE) and focus reduction neutralization test (FRNT)  
690 were used to evaluate the neutralizing antibody titers of sera from immunized mice.  
691 Briefly, sera were 4-fold serially diluted starting at 1:4 with DMEM supplemented  
692 with 2 % FBS and 1 % penicillin and streptomycin, and mixed with the equal volumes  
693 of 100 half tissue culture infective doses (100 TCID<sub>50</sub>) SARS-CoV-2-virus of  
694 2020XN4276 strain at 37 °C for 2 h. Afterwards, the sera-virus mixture was added to  
695 pre-plated Vero-E6 cells in 96-well culture plate, and incubated for an additional 96 h  
696 at 37 °C in 5 % CO<sub>2</sub> to observe the CPE at 40X magnification. Wells with pure virus  
697 treated, pure diluted sera treated or cell only was set as controls for each plate. Virus  
698 back titration was performed in each plate. All diluted serum samples were tested in  
699 duplicate. The neutralization antibody titers of all of sera were defined as the  
700 reciprocal of serum dilution that could neutralize 50 % of virus infection at 4 days  
701 post-infection.

702 As for the FRNT method, serum samples were 5-fold serially diluted starting at  
703 1:10, and mixed with the equal volumes of 100 focus forming unit (FFU)  
704 SARS-CoV-2 virus of human CHN/IQTC01/2020 strain in 96-well culture plate, and  
705 incubated for 1 h at 37 °C. The mixtures were then added to the 96-well plates that  
706 pre-seeded with Vero-E6 cells. After incubation for 1 h at 37 °C, 5 % CO<sub>2</sub>, mixtures  
707 were removed and replaced with 100 µL MEM containing 1.2 %



708 carboxymethylcellulose pre-warmed to 37 °C for an additional 24 hours culture.  
709 Thereafter, cells were fixed with 4% paraformaldehyde and permeabilized with 0.2%  
710 Triton X-100 in PBS, and then incubated with rabbit anti-SARS-CoV-2 nucleocapsid  
711 protein antibody (Sino Biological, Inc) for 1 hour at ambient temperature, followed by  
712 adding of a 1:4000 dilution of HRP-conjugated goat anti-rabbit IgG antibody (Jackson  
713 ImmunoResearch Laboratories, Inc. West Grove, PA). Plates were colorated using  
714 TrueBlue™ Peroxidase Substrate (KPL). Foci were counted on an ELISPOT reader  
715 (Cellular Technology Ltd. Cleveland, OH). The 90 % neutralization antibody titers  
716 (NT<sub>90</sub>) were defined as the reciprocal of serum dilution that could inhibit 90 % FFU  
717 of virus-infection, and was calculated with a 4-parameter nonlinear regression  
718 fitting from fitted curve using GraphPad Prism 8.

719

## 720 **Germinal center and Tfh analysis of mice drained lymph nodes**

721 Immunized mice were sacrificed by CO<sub>2</sub> inhalation 12 days after the 2<sup>nd</sup> boost  
722 immunization (40 days). To simultaneously identify germinal center B cells and T  
723 follicular helper cells of mice drained lymph nodes, cell suspensions of draining  
724 lymph nodes from mice sacrificed were stained with fixable viability stain 780 (BD  
725 Biosciences) and blocked with anti-CD16/32 antibody (BD Biosciences), followed by  
726 labeling with anti-B220-BV421 (BD Biosciences), anti-IgD-PE (BD Biosciences),  
727 anti-GL7-Alexa Fluor 647 (BD Biosciences), anti-CD95-FITC (BD Biosciences),  
728 anti-CD4-BV510 (BD Biosciences), anti-CD44-BV786 (BD Biosciences),  
729 anti-ICOS-PE-Cyanine7 (BD Biosciences), anti-CXCR5-PE-CF594 (BD Biosciences)  
730 and anti-PD-1-APC-R700 (BD Biosciences) in PBS in the presence of 2 % BSA. The  
731 fluorescence signal of labeled samples was acquired on a CytoFLEX S flow  
732 cytometry (BECKMAN COULTER).

733

## 734 **Intracellular cytokine staining**

735 Drained lymph nodes and spleen were harvested and washed with RPMI 1640  
736 medium. Then tissues were abraded into cell suspensions by the piston handle of 2 ml  
737 syringe in the culture medium (RPMI 1640 containing 10 % FBS and 1 % antibiotics).

738 The suspension was filtered with 40  $\mu\text{m}$  nylon mesh cell strainer (Sangon Biotech).  
739 Cells were washed with culture medium and sterile erythrocyte lysis buffer was added  
740 (1.5 M  $\text{NH}_4\text{Cl}$ , 100 mM  $\text{NaHCO}_3$ , 10 mM EDTA in deionized water, pH 7.4) to  
741 remove red blood cells, followed by staining with fixable viability stain 780 (BD  
742 Biosciences ) for 30 min at ambient temperature. Approximately  $1.0 \times 10^6$  cells were  
743 added to the 6-wells plates and treated with anti-CD16/32 antibody (BD Biosciences)  
744 to block the Fc receptor, and then stimulated with 15  $\mu\text{g}/\text{mL}$  purified RBD monomer  
745 for 3 h at 37  $^\circ\text{C}$ . After incubation, GolgiStop and GolgiPlug (BD Biosciences) was  
746 added to each well for an additional 15 hours at 37  $^\circ\text{C}$ . Next, the cells were harvested  
747 and washed twice with culture medium, and labeled with anti-CD3e-PerCP-Cy5.5  
748 (BD Biosciences), anti-CD4-BV510 (BD Biosciences) and anti-CD8a FITC (BD  
749 Biosciences) in PBS in the presence of 2 % BSA, after which cells were further fixed  
750 with 4 % paraformaldehyde and permeabilized with permeabilization buffer (2 %  
751 BSA, 0.1 % saponin, 0.05 %  $\text{Na}_3\text{N}$  in PBS). Finally, cells were washed with PBS in  
752 the presence of 2 % BSA and incubated with anti-IFN- $\gamma$ -PE-CY7 (BD Biosciences),  
753 anti-IL-2-APC (BD Biosciences), anti-TNF- $\alpha$ -PE (BD Biosciences) and control  
754 anti-IgG1 antibody for 30 min at 4  $^\circ\text{C}$ . The fluorescence signal of labeled samples  
755 was acquired on a CytoFLEX S flow cytometry (BECKMAN COULTER).

756

### 757 **BALB/c mice challenge**

758 For SARS-CoV-2 challenge experiment, the female 6-8 weeks old mice were  
759 arbitrarily divided into 5 groups in each group. All purified antigens were prepared by  
760 mixed 100  $\mu\text{L}$  protein solution diluted in PBS with an equivoluminal AddaVax  
761 adjuvant. Groups of twenty mice were immunized subcutaneously with a total protein  
762 dose corresponding to 10  $\mu\text{g}$  of the RBD antigen on week 0 and 3. Purified  
763 gp350D123 protein of Epstein-Barr virus, including the RBD, formulated with  
764 AddaVax adjuvant was used as negative control. Blood were collected at week 2 and  
765 5 for analysis. Sixty days after the second immunization, the mice were lightly  
766 anesthetized with isoflurane and intranasally transduced with  $2.5 \times 10^8$  PFU of  
767 Ad5-hACE2 virus. Five days following transduction, the transduced mice were

768 challenged with  $1 \times 10^5$  PFU of SARS-CoV-2 via the intranasal route. Weight changes  
769 of the challenged mice were observed for ten consecutive days. At 1 and 3 days after  
770 challenge, 4 mice in each group were sacrificed and their lung tissues were collected  
771 for titration of the virus titers. On day 4 after challenge, 2 mice in each group were  
772 sacrificed and necropsied, and lung tissues were collected for histopathological  
773 analysis.

774

### 775 **Sequence alignment and analysis**

776 Except the sequence of Wuhan-Hu-1 which was first identified from a COVID-19  
777 patient in Wuhan city <sup>5</sup>, obtained from National Center for Biotechnology Information  
778 (NCBI) database, other sequences are obtained from the  
779 Global Initiative on Sharing All Influenza Data (GISAID). The accession numbers of  
780 the RBD sequences of representative SARS CoV-2 strains isolated in different  
781 countries are as follows: Wuhan-Hu-1 (Genbank: MN908947),  
782 South\_Korea/KCDC2489/2020 (EPI\_ISL\_514892), Thailand/NIH-2492/2020  
783 (EPI\_ISL\_430841), Japan/Hu\_DP\_Kng\_19-027/2020 (EPI\_ISL\_412969),  
784 India/OR-RMRC25/2020 (EPI\_ISL\_455308), USA/WA-UW-1762/2020  
785 (EPI\_ISL\_424245), Mexico/CMX-IMSS\_01/2020 (EPI\_ISL\_424731),  
786 Canada/ON\_PHL2294/2020 (EPI\_ISL\_418384), Australia/VIC546/2020  
787 (EPI\_ISL\_426809), Greece/218\_35009/2020 (EPI\_ISL\_437886),  
788 Greece/218\_35009/2020 (EPI\_ISL\_437886), Greece/218\_35009/2020  
789 (EPI\_ISL\_437886), Greece/218\_35009/2020 (EPI\_ISL\_437886),  
790 Russia/SCPM-O-08/2020 (EPI\_ISL\_451970), Spain/Madrid\_LP24\_5999/2020  
791 (EPI\_ISL\_428680), Sweden/20-50261/2020 (EPI\_ISL\_469078),  
792 Switzerland/ZH-1000477102/2020 (EPI\_ISL\_413019), Portugal/PT0533/2020  
793 (EPI\_ISL\_454257), Scotland/CVR138/2020 (EPI\_ISL\_425681),  
794 Denmark/SSI-101/2020 (EPI\_ISL\_415646), England/20134020004/2020  
795 (EPI\_ISL\_423108) and Iceland/348/2020 (EPI\_ISL\_424372),  
796 Nigeria/OS085-CV14/2020 (EPI\_ISL\_455424) and Venezuela/VEN-95072/2020  
797 (EPI\_ISL\_476704).

798

## 799 **Quantification and statistical analysis**

800 Kinetic parameters of Biolayer interferometry was rendered by Octet Data  
801 Analysis software (Fortebio), and detailed curve fitting method could be found in  
802 methods. Statistical analyses of all experimental results were performed with  
803 GraphPad Prism 8.01 software. Except the results of flow cytometry are expressed as  
804 a percentage of positive cells, all of results are presented as mean  $\pm$  SEM. Method  
805 used for statistical difference between groups could be found in figure legends or  
806 corresponding methods for details.

807

## 808 **Acknowledgements**

809 This study was supported by the Sun Yat-sen University "Three major" scientific  
810 research special projects in 2020 (No. 84000-31143412), the National Natural Science  
811 Foundation of China (No. 81801645, 81830090, 81520108022, 81702001), the China  
812 Postdoctoral Science Foundation (No. 2017M612818), the National Science and  
813 Technology Major Project (No. 2018ZX09739002-004), the National Key Research  
814 and Development Program (2017YFA0505600, 2016YFA0502101), the Natural  
815 Science Foundation of Guangdong Province (No. 2017A030312003), the Guangdong  
816 Province Key Research and Development program (No. 2019B020226002), the  
817 Guangzhou Science Technology and Innovation Commission (No. 201607020038),.

818

## 819 **Author contributions**

820 Y.K., C.S., Z.Z., R.Y., C.K., J.Z., and M.Z. conceived and designed the project; M.Z.  
821 supervised the project; Y.K., C.S. and M.Z. wrote and edited the manuscript; Y.K.  
822 purified the RBD-conjugated NPs protein and performed the DLS and DSC  
823 experiment; Y.K. and Q.Z. performed the negative-stain EM; Y.K. and C.S.  
824 performed the mice experiment and analyzed the results; X.C. and C.S. performed the  
825 BLI assay; Y.K., R.Y., P.Z. and Z.Z. performed the neutralization assay.

826

## 827 **Competing interests**

828 Mu-Sheng Zeng has filed patent applications for the development of  
829 SARS-CoV-2 RBD-conjugated nanoparticle vaccine candidate. The authors declare  
830 no competing financial interests.

831

832 **Keywords:** SARS-CoV-2, RBD, Spytag-SpyCatcher, nanoparticle

833

834 **References**

835 1. de Wit, E.; van Doremalen, N.; Falzarano, D.; Munster, V. J., SARS and MERS: recent  
836 insights into emerging coronaviruses. *Nat Rev Microbiol* **2016**, *14*(8), 523-34.

837 2. Coronaviridae Study Group of the International Committee on Taxonomy of, V., The  
838 species Severe acute respiratory syndrome-related coronavirus: classifying 2019-nCoV and  
839 naming it SARS-CoV-2. *Nat Microbiol* **2020**, *5*(4), 536-544.

840 3. Petrosillo, N.; Viceconte, G.; Ergonul, O.; Ippolito, G.; Petersen, E., COVID-19, SARS and  
841 MERS: are they closely related? *Clin Microbiol Infect* **2020**, *26*(6), 729-734.

842 4. Chan, J. F.; Yuan, S.; Kok, K. H.; To, K. K.; Chu, H.; Yang, J.; Xing, F.; Liu, J.; Yip, C. C.;  
843 Poon, R. W.; Tsoi, H. W.; Lo, S. K.; Chan, K. H.; Poon, V. K.; Chan, W. M.; Ip, J. D.; Cai, J. P.;  
844 Cheng, V. C.; Chen, H.; Hui, C. K.; Yuen, K. Y., A familial cluster of pneumonia associated with  
845 the 2019 novel coronavirus indicating person-to-person transmission: a study of a family  
846 cluster. *Lancet* **2020**, *395*(10223), 514-523.

847 5. Wu, F.; Zhao, S.; Yu, B.; Chen, Y. M.; Wang, W.; Song, Z. G.; Hu, Y.; Tao, Z. W.; Tian, J.  
848 H.; Pei, Y. Y.; Yuan, M. L.; Zhang, Y. L.; Dai, F. H.; Liu, Y.; Wang, Q. M.; Zheng, J. J.; Xu, L.;  
849 Holmes, E. C.; Zhang, Y. Z., A new coronavirus associated with human respiratory disease in  
850 China. *Nature* **2020**, *579*(7798), 265-269.

851 6. Zhou, P.; Yang, X. L.; Wang, X. G.; Hu, B.; Zhang, L.; Zhang, W.; Si, H. R.; Zhu, Y.; Li, B.;

- 852 Huang, C. L.; Chen, H. D.; Chen, J.; Luo, Y.; Guo, H.; Jiang, R. D.; Liu, M. Q.; Chen, Y.; Shen,  
853 X. R.; Wang, X.; Zheng, X. S.; Zhao, K.; Chen, Q. J.; Deng, F.; Liu, L. L.; Yan, B.; Zhan, F. X.;  
854 Wang, Y. Y.; Xiao, G. F.; Shi, Z. L., A pneumonia outbreak associated with a new coronavirus  
855 of probable bat origin. *Nature* **2020**, *579*(7798), 270-273.
- 856 7. Walls, A. C.; Park, Y. J.; Tortorici, M. A.; Wall, A.; McGuire, A. T.; Velesler, D., Structure,  
857 Function, and Antigenicity of the SARS-CoV-2 Spike Glycoprotein. *Cell***2020**, *181*(2), 281-292  
858 e6.
- 859 8. Wrapp, D.; Wang, N.; Corbett, K. S.; Goldsmith, J. A.; Hsieh, C. L.; Abiona, O.; Graham, B.  
860 S.; McLellan, J. S., Cryo-EM structure of the 2019-nCoV spike in the prefusion conformation.  
861 *Science* **2020**, *367*(6483), 1260-1263.
- 862 9. Hoffmann, M.; Kleine-Weber, H.; Schroeder, S.; Kruger, N.; Herrler, T.; Erichsen, S.;  
863 Schiergens, T. S.; Herrler, G.; Wu, N. H.; Nitsche, A.; Muller, M. A.; Drosten, C.; Pohlmann, S.,  
864 SARS-CoV-2 Cell Entry Depends on ACE2 and TMPRSS2 and Is Blocked by a Clinically  
865 Proven Protease Inhibitor. *Cell***2020**, *181*(2), 271-280 e8.
- 866 10. Li, F.; Li, W.; Farzan, M.; Harrison, S. C., Structure of SARS coronavirus spike  
867 receptor-binding domain complexed with receptor. *Science* **2005**, *309*(5742), 1864-8.
- 868 11. Lan, J.; Ge, J.; Yu, J.; Shan, S.; Zhou, H.; Fan, S.; Zhang, Q.; Shi, X.; Wang, Q.; Zhang,  
869 L.; Wang, X., Structure of the SARS-CoV-2 spike receptor-binding domain bound to the ACE2  
870 receptor. *Nature* **2020**, *581*(7807), 215-220.
- 871 12. Shang, J.; Ye, G.; Shi, K.; Wan, Y.; Luo, C.; Aihara, H.; Geng, Q.; Auerbach, A.; Li, F.,  
872 Structural basis of receptor recognition by SARS-CoV-2. *Nature* **2020**, *581*(7807), 221-224.
- 873 13. Wang, Q.; Zhang, Y.; Wu, L.; Niu, S.; Song, C.; Zhang, Z.; Lu, G.; Qiao, C.; Hu, Y.; Yuen,

- 874 K. Y.; Wang, Q.; Zhou, H.; Yan, J.; Qi, J., Structural and Functional Basis of SARS-CoV-2  
875 Entry by Using Human ACE2. *Cell* **2020**, *181* (4), 894-904 e9.
- 876 14. Wang, N.; Shang, J.; Jiang, S.; Du, L., Subunit Vaccines Against Emerging Pathogenic  
877 Human Coronaviruses. *Front Microbiol* **2020**, *11*, 298.
- 878 15. Walls, A. C.; Fiala, B.; Schafer, A.; Wrenn, S.; Pham, M. N.; Murphy, M.; Tse, L. V.;  
879 Shehata, L.; O'Connor, M. A.; Chen, C.; Navarro, M. J.; Miranda, M. C.; Pettie, D.;  
880 Ravichandran, R.; Kraft, J. C.; Ogohara, C.; Palser, A.; Chalk, S.; Lee, E. C.; Kepl, E.; Chow, C.  
881 M.; Sydeman, C.; Hodge, E. A.; Brown, B.; Fuller, J. T.; Dinnon, K. H.; Gralinski, L. E.; Leist, S.  
882 R.; Gully, K. L.; Lewis, T. B.; Guttman, M.; Chu, H. Y.; Lee, K. K.; Fuller, D. H.; Baric, R. S.;  
883 Kellam, P.; Carter, L.; Pepper, M.; Sheahan, T. P.; Veesler, D.; King, N. P., Elicitation of potent  
884 neutralizing antibody responses by designed protein nanoparticle vaccines for SARS-CoV-2.  
885 *bioRxiv* **2020**.
- 886 16. Dai, L.; Zheng, T.; Xu, K.; Han, Y.; Xu, L.; Huang, E.; An, Y.; Cheng, Y.; Li, S.; Liu, M.;  
887 Yang, M.; Li, Y.; Cheng, H.; Yuan, Y.; Zhang, W.; Ke, C.; Wong, G.; Qi, J.; Qin, C.; Yan, J.;  
888 Gao, G. F., A Universal Design of Betacoronavirus Vaccines against COVID-19, MERS, and  
889 SARS. *Cell* **2020**, *182* (3), 722-733 e11.
- 890 17. Bruun, T. U. J.; Andersson, A. C.; Draper, S. J.; Howarth, M., Engineering a Rugged  
891 Nanoscaffold To Enhance Plug-and-Display Vaccination. *ACS Nano* **2018**, *12* (9), 8855-8866.
- 892 18. Keeble, A. H.; Turkki, P.; Stokes, S.; Khairil Anuar, I. N. A.; Rahikainen, R.; Hytonen, V. P.;  
893 Howarth, M., Approaching infinite affinity through engineering of peptide-protein interaction.  
894 *Proc Natl Acad Sci U S A* **2019**.
- 895 19. Banerjee, A.; Howarth, M., Nanoteamwork: covalent protein assembly beyond duets

- 896 towards protein ensembles and orchestras. *Curr Opin Biotechnol* **2018**, *51*, 16-23.
- 897 20. Wang, W.; Zhou, X.; Bian, Y.; Wang, S.; Chai, Q.; Guo, Z.; Wang, Z.; Zhu, P.; Peng, H.;  
898 Yan, X.; Li, W.; Fu, Y. X.; Zhu, M., Dual-targeting nanoparticle vaccine elicits a therapeutic  
899 antibody response against chronic hepatitis B. *Nat Nanotechnol* **2020**, *15*(5), 406-416.
- 900 21. Escolano, A.; Gristick, H. B.; Abernathy, M. E.; Merckenschlager, J.; Gautam, R.; Oliveira,  
901 T. Y.; Pai, J.; West, A. P., Jr.; Barnes, C. O.; Cohen, A. A.; Wang, H.; Golijanin, J.; Yost, D.;  
902 Keefe, J. R.; Wang, Z.; Zhao, P.; Yao, K. H.; Bauer, J.; Nogueira, L.; Gao, H.; Voll, A. V.;  
903 Montefiori, D. C.; Seaman, M. S.; Gazumyan, A.; Silva, M.; McGuire, A. T.; Stamatatos, L.;  
904 Irvine, D. J.; Wells, L.; Martin, M. A.; Bjorkman, P. J.; Nussenzweig, M. C., Immunization  
905 expands B cells specific to HIV-1 V3 glycan in mice and macaques. *Nature* **2019**, *570* (7762),  
906 468-473.
- 907 22. Yang, J.; Wang, W.; Chen, Z.; Lu, S.; Yang, F.; Bi, Z.; Bao, L.; Mo, F.; Li, X.; Huang, Y.;  
908 Hong, W.; Yang, Y.; Zhao, Y.; Ye, F.; Lin, S.; Deng, W.; Chen, H.; Lei, H.; Zhang, Z.; Luo, M.;  
909 Gao, H.; Zheng, Y.; Gong, Y.; Jiang, X.; Xu, Y.; Lv, Q.; Li, D.; Wang, M.; Li, F.; Wang, S.;  
910 Wang, G.; Yu, P.; Qu, Y.; Yang, L.; Deng, H.; Tong, A.; Li, J.; Wang, Z.; Yang, J.; Shen, G.;  
911 Zhao, Z.; Li, Y.; Luo, J.; Liu, H.; Yu, W.; Yang, M.; Xu, J.; Wang, J.; Li, H.; Wang, H.; Kuang, D.;  
912 Lin, P.; Hu, Z.; Guo, W.; Cheng, W.; He, Y.; Song, X.; Chen, C.; Xue, Z.; Yao, S.; Chen, L.; Ma,  
913 X.; Chen, S.; Gou, M.; Huang, W.; Wang, Y.; Fan, C.; Tian, Z.; Shi, M.; Wang, F. S.; Dai, L.;  
914 Wu, M.; Li, G.; Wang, G.; Peng, Y.; Qian, Z.; Huang, C.; Lau, J. Y.; Yang, Z.; Wei, Y.; Cen, X.;  
915 Peng, X.; Qin, C.; Zhang, K.; Lu, G.; Wei, X., A vaccine targeting the RBD of the S protein of  
916 SARS-CoV-2 induces protective immunity. *Nature* **2020**.
- 917 23. Kanekiyo, M.; Bu, W.; Joyce, M. G.; Meng, G.; Whittle, J. R.; Baxa, U.; Yamamoto, T.;



918 Narpala, S.; Todd, J. P.; Rao, S. S.; McDermott, A. B.; Koup, R. A.; Rossmann, M. G.; Mascola,  
919 J. R.; Graham, B. S.; Cohen, J. I.; Nabel, G. J., Rational Design of an Epstein-Barr Virus  
920 Vaccine Targeting the Receptor-Binding Site. *Cell* **2015**, *162* (5), 1090-100.

921 24. Hsia, Y.; Bale, J. B.; Gonen, S.; Shi, D.; Sheffler, W.; Fong, K. K.; Nattermann, U.; Xu, C.;  
922 Huang, P. S.; Ravichandran, R.; Yi, S.; Davis, T. N.; Gonen, T.; King, N. P.; Baker, D.,  
923 Corrigendum: Design of a hyperstable 60-subunit protein icosahedron. *Nature* **2016**, *540*  
924 (7631), 150.

925 25. Bale, J. B.; Gonen, S.; Liu, Y.; Sheffler, W.; Ellis, D.; Thomas, C.; Cascio, D.; Yeates, T.  
926 O.; Gonen, T.; King, N. P.; Baker, D., Accurate design of megadalton-scale two-component  
927 icosahedral protein complexes. *Science* **2016**, *353* (6297), 389-94.

928 26. Du, L.; Zhao, G.; Chan, C. C.; Sun, S.; Chen, M.; Liu, Z.; Guo, H.; He, Y.; Zhou, Y.; Zheng,  
929 B. J.; Jiang, S., Recombinant receptor-binding domain of SARS-CoV spike protein expressed  
930 in mammalian, insect and E. coli cells elicits potent neutralizing antibody and protective  
931 immunity. *Virology* **2009**, *393* (1), 144-50.

932 27. Shi, R.; Shan, C.; Duan, X.; Chen, Z.; Liu, P.; Song, J.; Song, T.; Bi, X.; Han, C.; Wu, L.;  
933 Gao, G.; Hu, X.; Zhang, Y.; Tong, Z.; Huang, W.; Liu, W. J.; Wu, G.; Zhang, B.; Wang, L.; Qi, J.;  
934 Feng, H.; Wang, F. S.; Wang, Q.; Gao, G. F.; Yuan, Z.; Yan, J., A human neutralizing antibody  
935 targets the receptor-binding site of SARS-CoV-2. *Nature* **2020**, *584* (7819), 120-124.

936 28. Mills, C. D.; Kincaid, K.; Alt, J. M.; Heilman, M. J.; Hill, A. M., M-1/M-2 macrophages and  
937 the Th1/Th2 paradigm. *J Immunol* **2000**, *164* (12), 6166-73.

938 29. Amanat, F.; Krammer, F., SARS-CoV-2 Vaccines: Status Report. *Immunity* **2020**, *52* (4),  
939 583-589.

- 940 30. Edwards, K. M., Vaccines targeting SARS-CoV-2 tested in humans. *Nat Med* **2020**, *26*(9),  
941 1336-1338.
- 942 31. Graham, B. S., Rapid COVID-19 vaccine development. *Science* **2020**, *368* (6494),  
943 945-946.
- 944 32. Ng, W. H.; Liu, X.; Mahalingam, S., Development of vaccines for SARS-CoV-2. *F1000Res*  
945 **2020**, *9*.
- 946 33. Hou, Y. J.; Okuda, K.; Edwards, C. E.; Martinez, D. R.; Asakura, T.; Dinnon, K. H., 3rd;  
947 Kato, T.; Lee, R. E.; Yount, B. L.; Mascenik, T. M.; Chen, G.; Olivier, K. N.; Ghio, A.; Tse, L. V.;  
948 Leist, S. R.; Gralinski, L. E.; Schafer, A.; Dang, H.; Gilmore, R.; Nakano, S.; Sun, L.; Fulcher,  
949 M. L.; Livraghi-Butrico, A.; Nicely, N. I.; Cameron, M.; Cameron, C.; Kelvin, D. J.; de Silva, A.;  
950 Margolis, D. M.; Markmann, A.; Bartelt, L.; Zumwalt, R.; Martinez, F. J.; Salvatore, S. P.;  
951 Borczuk, A.; Tata, P. R.; Sontake, V.; Kimple, A.; Jaspers, I.; O'Neal, W. K.; Randell, S. H.;  
952 Boucher, R. C.; Baric, R. S., SARS-CoV-2 Reverse Genetics Reveals a Variable Infection  
953 Gradient in the Respiratory Tract. *Cell* **2020**, *182*(2), 429-446 e14.
- 954 34. Thi Nhu Thao, T.; Labroussaa, F.; Ebert, N.; V'Kovski, P.; Stalder, H.; Portmann, J.; Kelly,  
955 J.; Steiner, S.; Holwerda, M.; Kratzel, A.; Gultom, M.; Schmied, K.; Laloli, L.; Husser, L.; Wider,  
956 M.; Pfaender, S.; Hirt, D.; Cippa, V.; Crespo-Pomar, S.; Schroder, S.; Muth, D.; Niemeyer, D.;  
957 Corman, V. M.; Muller, M. A.; Drosten, C.; Dijkman, R.; Jores, J.; Thiel, V., Rapid  
958 reconstruction of SARS-CoV-2 using a synthetic genomics platform. *Nature* **2020**, *582* (7813),  
959 561-565.
- 960 35. Case, J. B.; Rothlauf, P. W.; Chen, R. E.; Liu, Z.; Zhao, H.; Kim, A. S.; Bloyet, L. M.; Zeng,  
961 Q.; Tahan, S.; Droit, L.; Ilagan, M. X. G.; Tartell, M. A.; Amarasinghe, G.; Henderson, J. P.;

- 962 Miersch, S.; Ustav, M.; Sidhu, S.; Virgin, H. W.; Wang, D.; Ding, S.; Corti, D.; Theel, E. S.;
- 963 Fremont, D. H.; Diamond, M. S.; Whelan, S. P. J., Neutralizing Antibody and Soluble ACE2
- 964 Inhibition of a Replication-Competent VSV-SARS-CoV-2 and a Clinical Isolate of SARS-CoV-2.
- 965 *Cell Host Microbe* **2020**, *28* (3), 475-485 e5.
- 966 36. Mercado, N. B.; Zahn, R.; Wegmann, F.; Loos, C.; Chandrashekar, A.; Yu, J.; Liu, J.;
- 967 Peter, L.; McMahan, K.; Tostanoski, L. H.; He, X.; Martinez, D. R.; Rutten, L.; Bos, R.; van
- 968 Manen, D.; Vellinga, J.; Custers, J.; Langedijk, J. P.; Kwaks, T.; Bakkers, M. J. G.; Zuijdgeest,
- 969 D.; Rosendahl Huber, S. K.; Atyeo, C.; Fischinger, S.; Burke, J. S.; Feldman, J.; Hauser, B. M.;
- 970 Caradonna, T. M.; Bondzie, E. A.; Dagotto, G.; Gebre, M. S.; Hoffman, E.; Jacob-Dolan, C.;
- 971 Kirilova, M.; Li, Z.; Lin, Z.; Mahrokhian, S. H.; Maxfield, L. F.; Nampanya, F.; Nityanandam, R.;
- 972 Nkolola, J. P.; Patel, S.; Ventura, J. D.; Verrington, K.; Wan, H.; Pessaint, L.; Van Ry, A.; Blade,
- 973 K.; Strasbaugh, A.; Cabus, M.; Brown, R.; Cook, A.; Zouantchangadou, S.; Teow, E.;
- 974 Andersen, H.; Lewis, M. G.; Cai, Y.; Chen, B.; Schmidt, A. G.; Reeves, R. K.; Baric, R. S.;
- 975 Lauffenburger, D. A.; Alter, G.; Stoffels, P.; Mammen, M.; Van Hoof, J.; Schuitemaker, H.;
- 976 Barouch, D. H., Single-shot Ad26 vaccine protects against SARS-CoV-2 in rhesus macaques.
- 977 *Nature* **2020**.
- 978 37. Zhang, N. N.; Li, X. F.; Deng, Y. Q.; Zhao, H.; Huang, Y. J.; Yang, G.; Huang, W. J.; Gao,
- 979 P.; Zhou, C.; Zhang, R. R.; Guo, Y.; Sun, S. H.; Fan, H.; Zu, S. L.; Chen, Q.; He, Q.; Cao, T. S.;
- 980 Huang, X. Y.; Qiu, H. Y.; Nie, J. H.; Jiang, Y.; Yan, H. Y.; Ye, Q.; Zhong, X.; Xue, X. L.; Zha, Z.
- 981 Y.; Zhou, D.; Yang, X.; Wang, Y. C.; Ying, B.; Qin, C. F., A Thermostable mRNA Vaccine
- 982 against COVID-19. *Cell* **2020**, *182* (5), 1271-1283 e16.
- 983 38. Gao, Q.; Bao, L.; Mao, H.; Wang, L.; Xu, K.; Yang, M.; Li, Y.; Zhu, L.; Wang, N.; Lv, Z.;

- 984 Gao, H.; Ge, X.; Kan, B.; Hu, Y.; Liu, J.; Cai, F.; Jiang, D.; Yin, Y.; Qin, C.; Li, J.; Gong, X.; Lou,  
985 X.; Shi, W.; Wu, D.; Zhang, H.; Zhu, L.; Deng, W.; Li, Y.; Lu, J.; Li, C.; Wang, X.; Yin, W.;  
986 Zhang, Y.; Qin, C., Development of an inactivated vaccine candidate for SARS-CoV-2.  
987 *Science* **2020**, *369* (6499), 77-81.
- 988 39. Wang, H.; Zhang, Y.; Huang, B.; Deng, W.; Quan, Y.; Wang, W.; Xu, W.; Zhao, Y.; Li, N.;  
989 Zhang, J.; Liang, H.; Bao, L.; Xu, Y.; Ding, L.; Zhou, W.; Gao, H.; Liu, J.; Niu, P.; Zhao, L.;  
990 Zhen, W.; Fu, H.; Yu, S.; Zhang, Z.; Xu, G.; Li, C.; Lou, Z.; Xu, M.; Qin, C.; Wu, G.; Gao, G. F.;  
991 Tan, W.; Yang, X., Development of an Inactivated Vaccine Candidate, BBIBP-CorV, with  
992 Potent Protection against SARS-CoV-2. *Cell* **2020**, *182* (3), 713-721 e9.
- 993 40. Rappuoli, R.; Serruto, D., Self-Assembling Nanoparticles Usher in a New Era of Vaccine  
994 Design. *Cell* **2019**, *176* (6), 1245-1247.
- 995 41. Irvine, D. J.; Hanson, M. C.; Rakhra, K.; Tokatlian, T., Synthetic Nanoparticles for  
996 Vaccines and Immunotherapy. *Chem Rev* **2015**, *115* (19), 11109-46.
- 997 42. Huang, P. S.; Boyken, S. E.; Baker, D., The coming of age of de novo protein design.  
998 *Nature* **2016**, *537* (7620), 320-7.
- 999 43. Du, L.; He, Y.; Zhou, Y.; Liu, S.; Zheng, B. J.; Jiang, S., The spike protein of  
1000 SARS-CoV--a target for vaccine and therapeutic development. *Nat Rev Microbiol* **2009**, *7* (3),  
1001 226-36.
- 1002 44. Starr, T. N.; Greaney, A. J.; Hilton, S. K.; Ellis, D.; Crawford, K. H. D.; Dingens, A. S.;  
1003 Navarro, M. J.; Bowen, J. E.; Tortorici, M. A.; Walls, A. C.; King, N. P.; Veessler, D.; Bloom, J.  
1004 D., Deep Mutational Scanning of SARS-CoV-2 Receptor Binding Domain Reveals Constraints  
1005 on Folding and ACE2 Binding. *Cell* **2020**, *182* (5), 1295-1310 e20.

1006 45. Arvin, A. M.; Fink, K.; Schmid, M. A.; Cathcart, A.; Spreafico, R.; Havenar-Daughton, C.;  
1007 Lanzavecchia, A.; Corti, D.; Virgin, H. W., A perspective on potential antibody-dependent  
1008 enhancement of SARS-CoV-2. *Nature* **2020**, *584*(7821), 353-363.

1009 46. Wang, Y.; Wang, L.; Cao, H.; Liu, C., SARS-CoV-2 S1 is superior to the RBD as a  
1010 COVID-19 subunit vaccine antigen. *J Med Virol* **2020**.

1011 47. Bachmann, M. F.; Jennings, G. T., Vaccine delivery: a matter of size, geometry, kinetics  
1012 and molecular patterns. *Nat Rev Immunol* **2010**, *10*(11), 787-96.

1013 48. Graham, B. S.; Gilman, M. S. A.; McLellan, J. S., Structure-Based Vaccine Antigen  
1014 Design. *Annu Rev Med* **2019**, *70*, 91-104.

1015 49. Zhang, X.; Zhao, B.; Ding, M.; Song, S.; Kang, Y.; Yu, Y.; Xu, M.; Xiang, T.; Gao, L.; Feng,  
1016 Q.; Zhao, Q.; Zeng, M. S.; Krummenacher, C.; Zeng, Y. X., A novel vaccine candidate based  
1017 on chimeric virus-like particle displaying multiple conserved epitope peptides induced  
1018 neutralizing antibodies against EBV infection. *Theranostics* **2020**, *10*(13), 5704-5718.

1019 50. Ou, X.; Liu, Y.; Lei, X.; Li, P.; Mi, D.; Ren, L.; Guo, L.; Guo, R.; Chen, T.; Hu, J.; Xiang, Z.;  
1020 Mu, Z.; Chen, X.; Chen, J.; Hu, K.; Jin, Q.; Wang, J.; Qian, Z., Characterization of spike  
1021 glycoprotein of SARS-CoV-2 on virus entry and its immune cross-reactivity with SARS-CoV.  
1022 *Nat Commun* **2020**, *11*(1), 1620.

1023 51. Robert, X.; Gouet, P., Deciphering key features in protein structures with the new  
1024 ENDscript server. *Nucleic Acids Res* **2014**, *42* (Web Server issue), W320-4.

1025

1026

1027 **Figure legend**

1028

1029 **Figure 1. Construction and structural characteristics of RBD-conjugated**

1030 **nanoparticles.**

1031 (A) Sketch of RBD nanoparticle design. The left flow diagram shows a brief  
1032 introduction to the modification to RBD and nanoparticle scaffolds with fusion of  
1033 SpyTag-SpyCatcher system. The right schema display ideal nanoparticles with full  
1034 valency of RBD. Colors of each nanoparticle is accordant to the displayed palette  
1035 of the following charts.

1036 (B) Construction of target protein expression plasmid in different expression system,  
1037 E. coli and HEK293F.

1038 (C) Reduced SDS-PAGE of the RBD monomer, RBD-conjugated NPs and unbonded  
1039 nanoparticles. A high covalent bond linking efficiency is achieved as the blot of  
1040 RBD monomer and unlinked nanoparticle scaffold disappear in the lane of  
1041 RBD-conjugated NPs.

1042 (D) Size exclusion chromatography (SEC) of RBD monomer, RBD-conjugated NPs  
1043 and unbonded nanoparticles on Superose 6 increase 10/300GL. Peak forward  
1044 shifts of retention are observed after bond linking of RBD-SpyTag and  $\Delta$   
1045 N1-SpyCatcher-NPs.

1046 (E) Dynamic light scattering (DLS) of RBD monomer, RBD-conjugated NPs and  
1047 unbonded nanoparticles. Increased hydrodynamics diameters of nanoparticles  
1048 after bond linking are shown.

1049

1050 **Figure 2. Assembly validation and physical evaluation of nanoparticles.**

1051 (A) Negative stain electron micrographs of unlinked nanoparticles and  
1052 RBD-conjugated NPs.

1053 (B) Detailed information of DLS and nano DSF results.

1054 a.  $R_d$ : Hydrodynamics diameter

1055 b. PDI: Polydispersity index, PDI lower than 0.2 indicates a uniform particle size.

1056 c.  $T_{m1}$ : the first melting temperature

1057 d.  $T_{m2}$ : the second melting temperature

1058 e.  $T_{aggr}$ : the aggregation temperature

1059 f. Melting temperature and aggregation temperature are given by the analysis  
1060 software of nanoDSF

1061

1062 **Figure 3. Antigenicity characterization of RBD monomer and RBD-conjugated**  
1063 **nanoparticles.**

1064 (A) ELISA assay of ACE2 and CB6 antibody binding capability. Statistical analysis of  
1065 binding titers between RBD monomer and the three RBD-NPs was performed  
1066 using 2-way ANOVA corrected with Dunnett method.

1067 (B)(C) Biolayer interferometry (BLI) kinetic assays of RBD monomer and RBD-NPs.

1068 (D) Detailed information of BLI assay.

1069 a.  $k_D$ : binding affinity constant calculated by  $k_{on}/k_{dis}$ , smaller values generally  
1070 indicate stronger binding capability

1071 b.  $k_{on}$ : association rates

1072 c.  $k_{dis}$ : dissociation rates

1073

1074 **Figure 4. Immunogenicity characterization of RBD monomer and**  
1075 **RBD-conjugated nanoparticles.**

1076 (A) Schematic flow diagram of animal immunization procedures.

1077 (B) Serum antibody titers of mice immunized by immunogen adjuvanted with  
1078 AddaVax or SAS determined by ELISA. Statistical difference between RBD  
1079 monomer and RBD-NPs are calculated with Two-way ANOVA corrected by  
1080 Dunnett method with setting the monomer as control group. \*  $p < 0.05$ ; \*\*  $p <$   
1081  $0.01$ ; \*\*\*  $p < 0.001$ ; \*\*\*\*  $p < 0.0001$ .

1082 (C) BLI serum competition assay of sera from immunized with RBD monomer and  
1083 RBD-NPs adjuvanted with AddaVax against ACE2 or CB6 antibody.  $R_c$  represent  
1084 the binding signal of ACE2 or CB6 under each dilution level.  $R_o$  represent the  
1085 binding signal of serum-free binding signal of ACE2 or CB6.

1086 (D) Heatmap overview of competition assay. The competition level presented by ratio  
1087  $(R_o - R_c)/R_o$ . Brighter color indicates stronger competition against receptor ACE2  
1088 or neutralizing antibody CB6 under each dilution level.

1089

1090 **Figure 5. Neutralizing capability of mice sera of RBD monomer and**  
1091 **RBD-conjugated nanoparticles.**

1092 (A) SARS-CoV-2 pseudovirus neutralizing assay shows the NT<sub>90</sub>.

1093 (B) SARS-CoV-2 live virus neutralizing assay show the focus reduction NT<sub>90</sub>  
1094 (FRNT<sub>90</sub>).

1095 Statistical difference of neutralizing titers of mice immunized by immunogen  
1096 adjuvanted with AddaVax or SAS are calculated with unpaired two-tailed  
1097 non-parametric Mann-Whitney U test. \* p < 0.05; \*\* p < 0.01; \*\*\* p < 0.001;  
1098 \*\*\*\* p < 0.0001.

1099 (C) Table of SARS-CoV-2 live virus neutralizing titers determined by induced  
1100 cytopathic effect (CPE). Deeper red color represents a higher dilution ratio.

1101

1102 **Supporting Information**

1103

1104 **Figure S1. Sequence alignment of RBD from 24 representative SARS-CoV-2**  
1105 **strains isolated from six continents.** The sequence of 24 RBD was downloaded from  
1106 Genbank and GISAID. The strain isolated from Asia, North America, Oceania,  
1107 Europe, Africa and South America was colored by brown, orange, olivedrab, black,  
1108 green and cyan, respectively. Conserved residues are highlighted in red. Multiple  
1109 sequences were aligned by MAFFT (<https://mafft.cbrc.jp>). The sequence alignment  
1110 was converted with Clustal X2 (<http://www.clustal.org>) and visualized with ESPript  
1111 3.0<sup>51</sup>.

1112

1113 **Figure S2a. Co-structure of SARS-CoV-2 spike protein RBD with human ACE2.**

1114 The SARS-CoV-2 spike protein trimer (Marine blue for chain with up-conformation  
1115 RBD and grey with down-conformation RBD) (PDB code: 6VSB) is aligned to the  
1116 complex of RBD (red) and human ACE2 (Light green) (PDB code: 6M0J) at the  
1117 up-conformation RBD to display the binding interface.

1118



1119 **Figure S2b. Schematic presentation of covalent bond linking strategy used in**  
1120 **RBD-conjugated nanoparticle construction.**

1121 The RBD fused with SpyTag would automatically links to the  $\Delta$ N1-SpyCatcher-fused  
1122 nanoparticle scaffolds ferritin (PDB code: 3BVE), mi3<sup>17, 24</sup> and I53-50 (PDB code:  
1123 6P6F) to form a complex of SpyTag-SpyCatcher (PDB code: 4MLI) in between as the  
1124 bridge. The linked nanoparticles would present RBD (red cartoon with grey surface)  
1125 on the surface as shown by alignment of C-terminus of RBD with the N-terminus of  
1126 scaffolds.

1127

1128 **Figure S3. Flowcytometry assay of immune spectrum of drained lymph nodes of**  
1129 **immunized mice.**

1130 (A) Germinal center B cells are marked out from the drained lymph node using B220+  
1131 (CD45R), IgD-low, GL7+ and CD95+ as cell marker. Ratio of the positive cells  
1132 are presented.

1133 (B) T follicular helper (Tfh) cells are marked out using CD4+, CD44+, PD-1+ and  
1134 CXCR5+ as cell marker. Ratio of the positive cells are presented.

1135 (C)(D) Cytokine-secreting CD4+ and CD8+ T cells are marked out using CD4+ and  
1136 IFN- $\gamma$ +/IL-2+/TNF- $\alpha$ + as cell markers.

1137

1138 **Figure S4. Flowcytometry assay of immune spectrum of spleen of immunized**  
1139 **mice.**

1140 (A)(B) Cytokine-secreting CD4+ and CD8+ T cells are marked out using CD4+ and  
1141 IFN- $\gamma$ +/IL-2+/TNF- $\alpha$ + as cell markers.

1142

Figure. 1

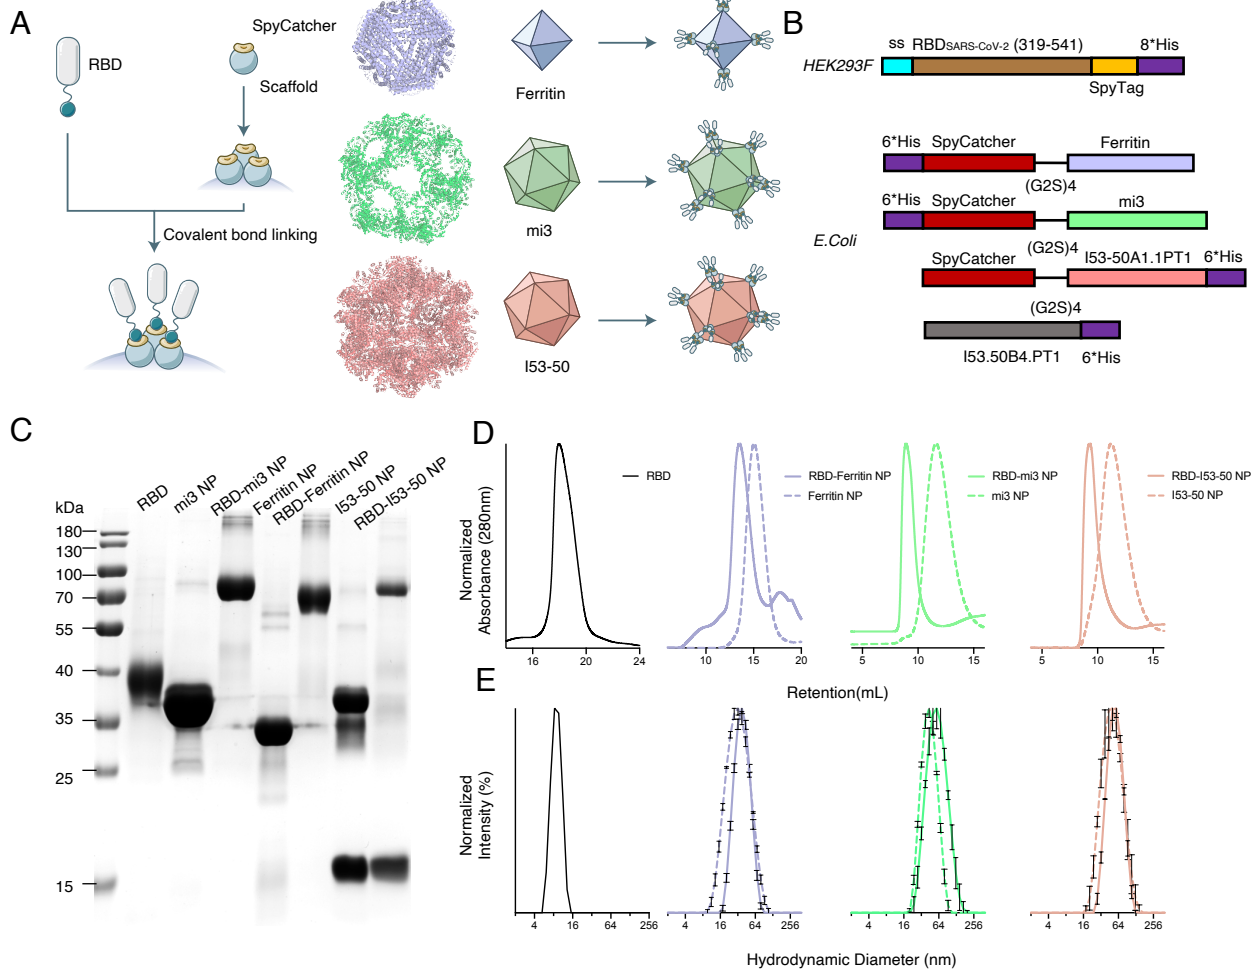

# Figure. 2

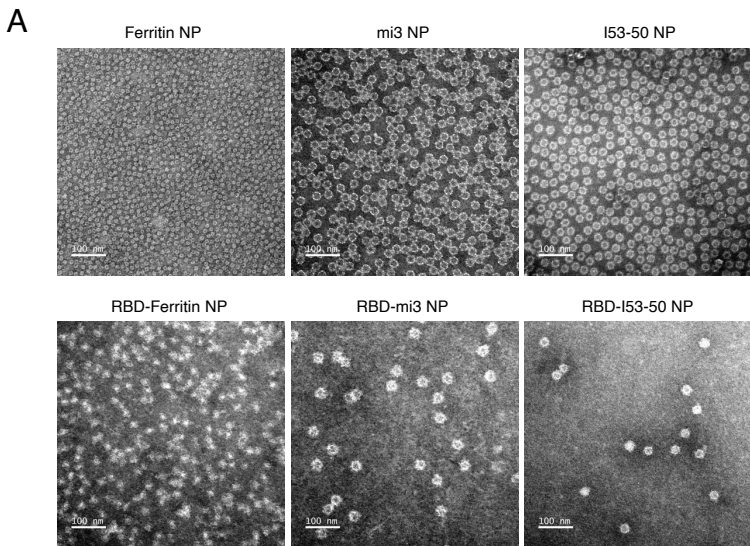

**B**

|                 | Particle size (DLS)                    |                      | Thermostability (nano DSF) <sup>f</sup> |                                         |                                           |
|-----------------|----------------------------------------|----------------------|-----------------------------------------|-----------------------------------------|-------------------------------------------|
|                 | <i>R<sub>d</sub></i> (nm) <sup>a</sup> | PDI (%) <sup>b</sup> | <i>T<sub>m1</sub></i> (°C) <sup>c</sup> | <i>T<sub>m2</sub></i> (°C) <sup>d</sup> | <i>T<sub>aggr</sub></i> (°C) <sup>e</sup> |
| RBD             | 8.98±0.03                              | 0.190±0.07           | 46.83±0.08                              | NA                                      | NA                                        |
| Ferritin NP     | 28.75±0.18                             | 0.184±0.01           | 53.65±1.00                              | NA                                      | 34.74±1.14                                |
| RBD-Ferritin NP | 32.99±0.04                             | 0.175±0.01           | 49.54±0.18                              | NA                                      | NA                                        |
| mi3 NP          | 41.87±0.39                             | 0.094±0.02           | 33.31                                   | 58.99                                   | 29.38                                     |
| RBD-mi3 NP      | 55.19±0.49                             | 0.163±0.01           | 42.55±0.18                              | NA                                      | NA                                        |
| I53-50 NP       | 46.54±0.40                             | 0.151±0.01           | 78.16±0.25                              | 89.90±0.03                              | 77.15±0.29                                |
| RBD-I53-50 NP   | 50.67±0.11                             | 0.135±0.01           | 41.99±0.12                              | 77.42±0.29                              | 69.73±0.67                                |

Figure. 3

A

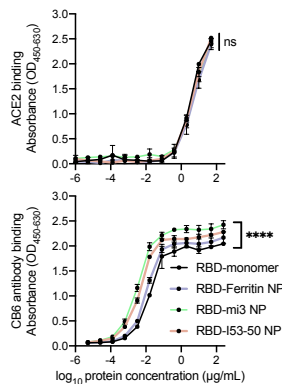

D

| Loading arrangement |                 | Kinetic values       |                                       |                                           |                                           |
|---------------------|-----------------|----------------------|---------------------------------------|-------------------------------------------|-------------------------------------------|
| Coupled             | Analyte         | Sensors ( <i>n</i> ) | <i>K<sub>D</sub></i> (M) <sup>a</sup> | <i>k<sub>on</sub></i> (1/Ms) <sup>b</sup> | <i>k<sub>dis</sub></i> (1/s) <sup>c</sup> |
|                     | RBD             | 5                    | 4.34E-09                              | 1.18E+05                                  | 5.11E-04                                  |
|                     | RBD-Ferritin NP | 4                    | 1.74E-08                              | 3.28E+04                                  | 5.68E-04                                  |
|                     | RBD-mi3 NP      | 5                    | <1.0E-12                              | 1.57E+04                                  | <1.0E-07                                  |
| ACE2                | RBD-I53-50 NP   | 4                    | 1.00E-09                              | 8.75E+05                                  | 8.77E-04                                  |
|                     | RBD             | 5                    | 4.86E-09                              | 5.97E+05                                  | 2.90E-03                                  |
|                     | RBD-Ferritin NP | 4                    | 9.77E-10                              | 6.82E+06                                  | 6.66E-03                                  |
|                     | RBD-mi3 NP      | 4                    | 5.25E-11                              | 3.57E+05                                  | 1.88E-05                                  |
| CB6 antibody        | RBD-I53-50 NP   | 4                    | 4.31E-10                              | 4.98E+05                                  | 2.15E-04                                  |

B

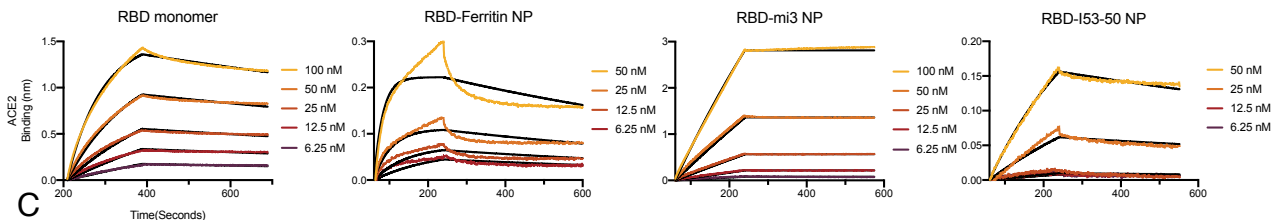

C

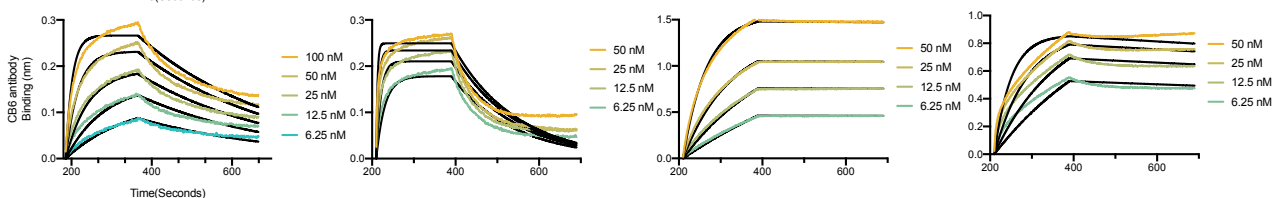

Figure. 4

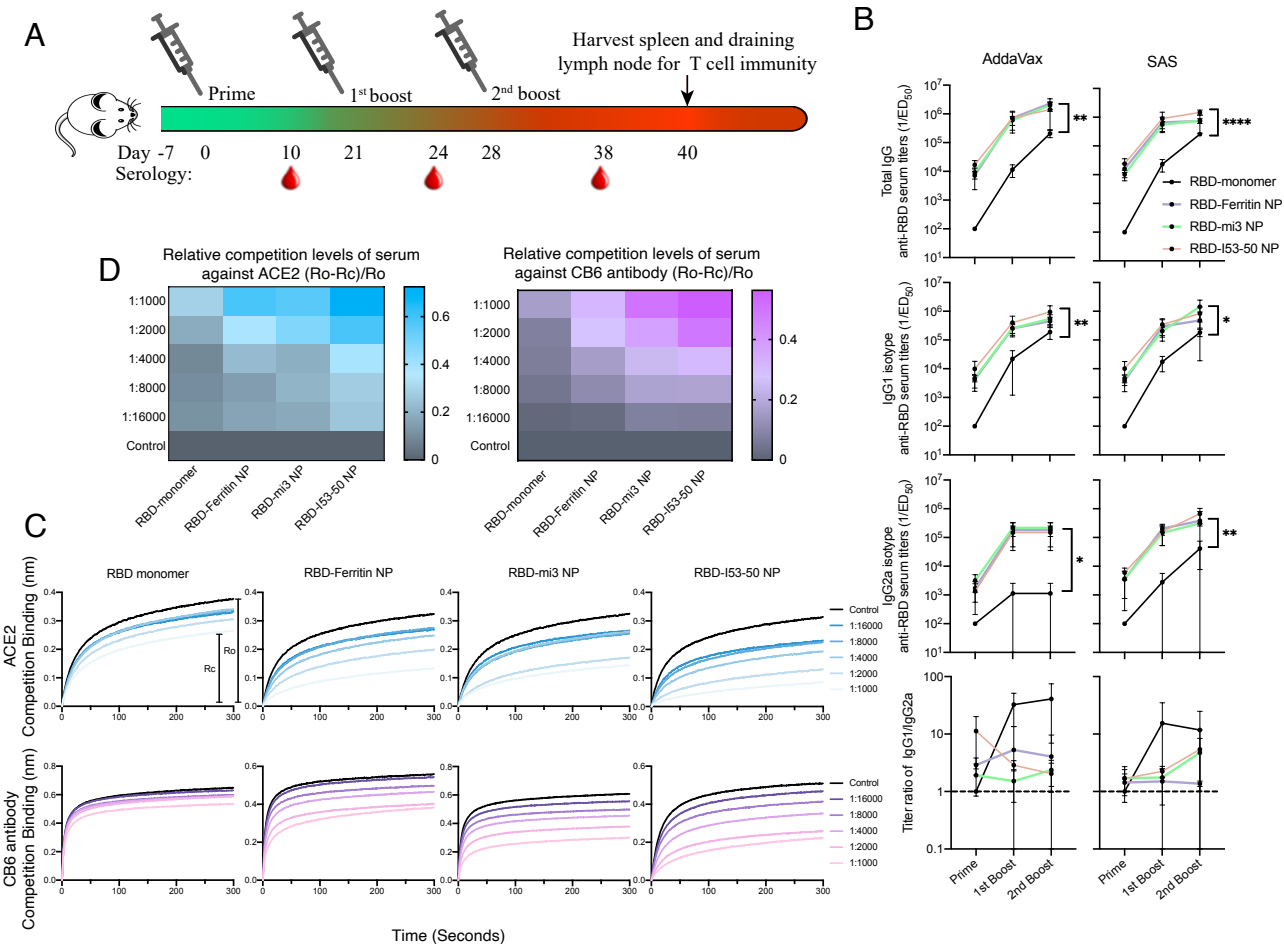

Figure. 5

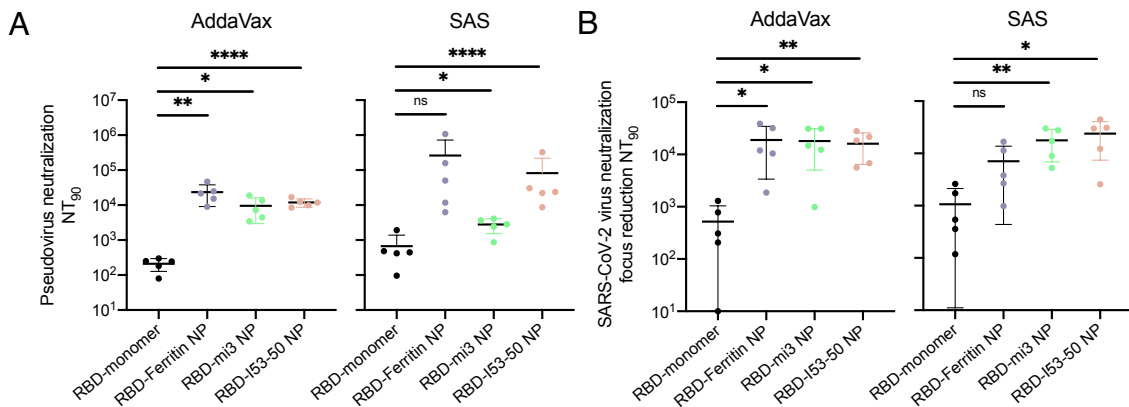

**C**

| Immunogen (Addavax adjuvanted) | Mouse ID | NT50 of different immunization procedures |           |           | Immunogen (SAS adjuvanted) | Mouse ID | NT50 of different immunization procedures |           |           |
|--------------------------------|----------|-------------------------------------------|-----------|-----------|----------------------------|----------|-------------------------------------------|-----------|-----------|
|                                |          | Prime                                     | 1st boost | 2nd boost |                            |          | Prime                                     | 1st boost | 2nd boost |
| RBD                            | 1        | < 4                                       | < 4       | 32        | RBD                        | 21       | < 4                                       | 8         | 1024      |
|                                | 2        | < 4                                       | 64        | 1024      |                            | 22       | < 4                                       | 32        | > 1024    |
|                                | 3        | < 4                                       | 4         | 128       |                            | 23       | < 4                                       | 4         | 1024      |
|                                | 4        | < 4                                       | 4         | 256       |                            | 24       | < 4                                       | 16        | 1024      |
|                                | 5        | < 4                                       | 32        | 512       |                            | 25       | < 4                                       | < 4       | 128       |
|                                | 6        | < 4                                       | 512       | 1024      |                            | 26       | < 4                                       | 512       | 4096      |
| RBD-mi3 NP                     | 7        | < 4                                       | 1024      | > 8192    | RBD-mi3 NP                 | 27       | < 4                                       | > 1024    | > 8192    |
|                                | 8        | < 4                                       | 1024      | 6144      |                            | 28       | < 4                                       | 1024      | > 8192    |
|                                | 9        | < 4                                       | 512       | 6144      |                            | 29       | < 4                                       | > 1024    | 8192      |
|                                | 10       | < 4                                       | 1024      | 8192      |                            | 30       | < 4                                       | 512       | 3072      |
|                                | 11       | < 4                                       | > 1024    | > 8192    |                            | 31       | < 4                                       | 256       | 6144      |
| RBD-Ferritin NP                | 12       | 8                                         | 1024      | 6144      | RBD-Ferritin NP            | 32       | < 4                                       | > 1024    | 3072      |
|                                | 13       | 8                                         | > 1024    | 8192      |                            | 33       | < 4                                       | 1024      | 4096      |
|                                | 14       | < 4                                       | 512       | 1536      |                            | 34       | < 4                                       | > 1024    | 3072      |
|                                | 15       | < 4                                       | > 1024    | 6144      |                            | 35       | < 4                                       | 256       | 2048      |
| RBD-I53-50 NP                  | 16       | < 4                                       | 1024      | > 8192    | RBD-I53-50 NP              | 36       | 32                                        | 1024      | > 8192    |
|                                | 17       | 8                                         | > 1024    | 4096      |                            | 37       | 8                                         | 1024      | > 8192    |
|                                | 18       | 8                                         | 128       | 4096      |                            | 38       | 8                                         | > 1024    | > 8192    |
|                                | 19       | 8                                         | > 1024    | > 8192    |                            | 39       | 4                                         | > 1024    | 8192      |
|                                | 20       | < 4                                       | > 1024    | 8192      |                            | 40       | 8                                         | 1024      | 3072      |
| PBS                            | 41       | < 4                                       | < 4       | < 4       | PBS                        | 41       | < 4                                       | < 4       | < 4       |
|                                | 42       | < 4                                       | < 4       | < 4       |                            | 42       | < 4                                       | < 4       | < 4       |
|                                | 43       | < 4                                       | < 4       | < 4       |                            | 43       | < 4                                       | < 4       | < 4       |
|                                | 44       | < 4                                       | < 4       | < 4       |                            | 44       | < 4                                       | < 4       | < 4       |
|                                | 45       | < 4                                       | < 4       | < 4       |                            | 45       | < 4                                       | < 4       | < 4       |







Figure S2A

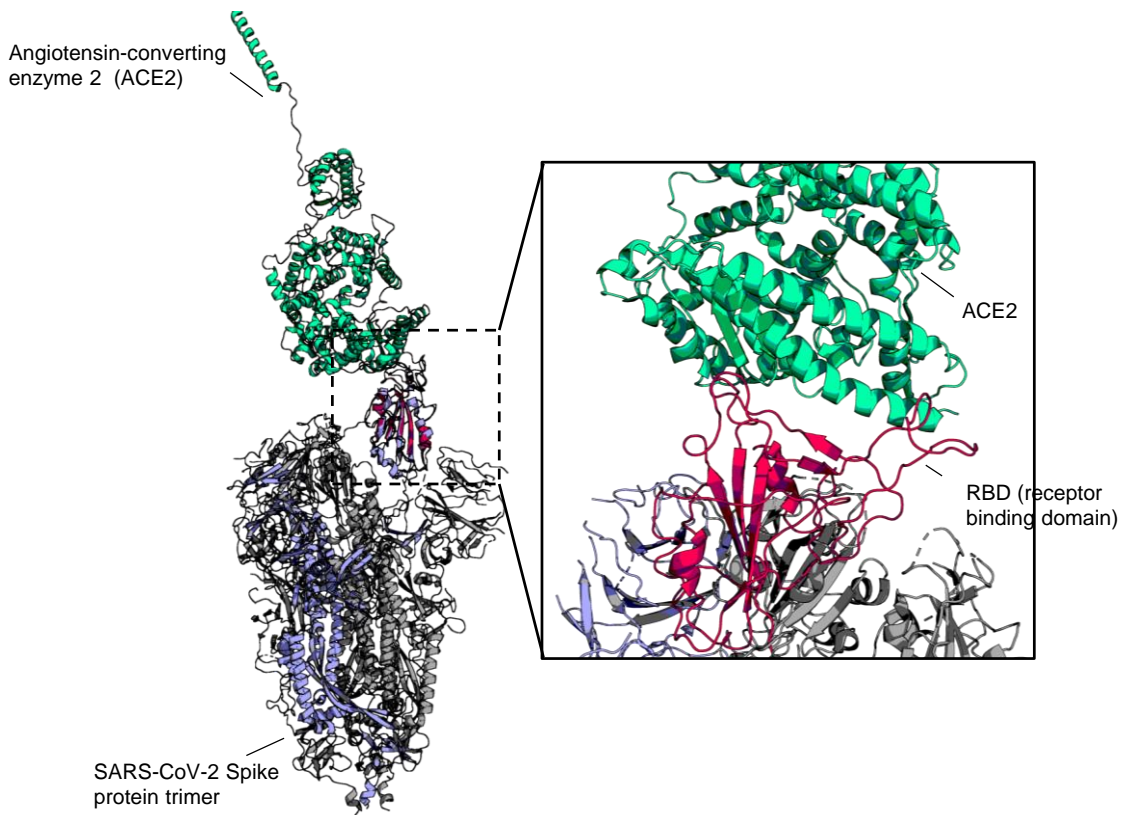

Figure S2B

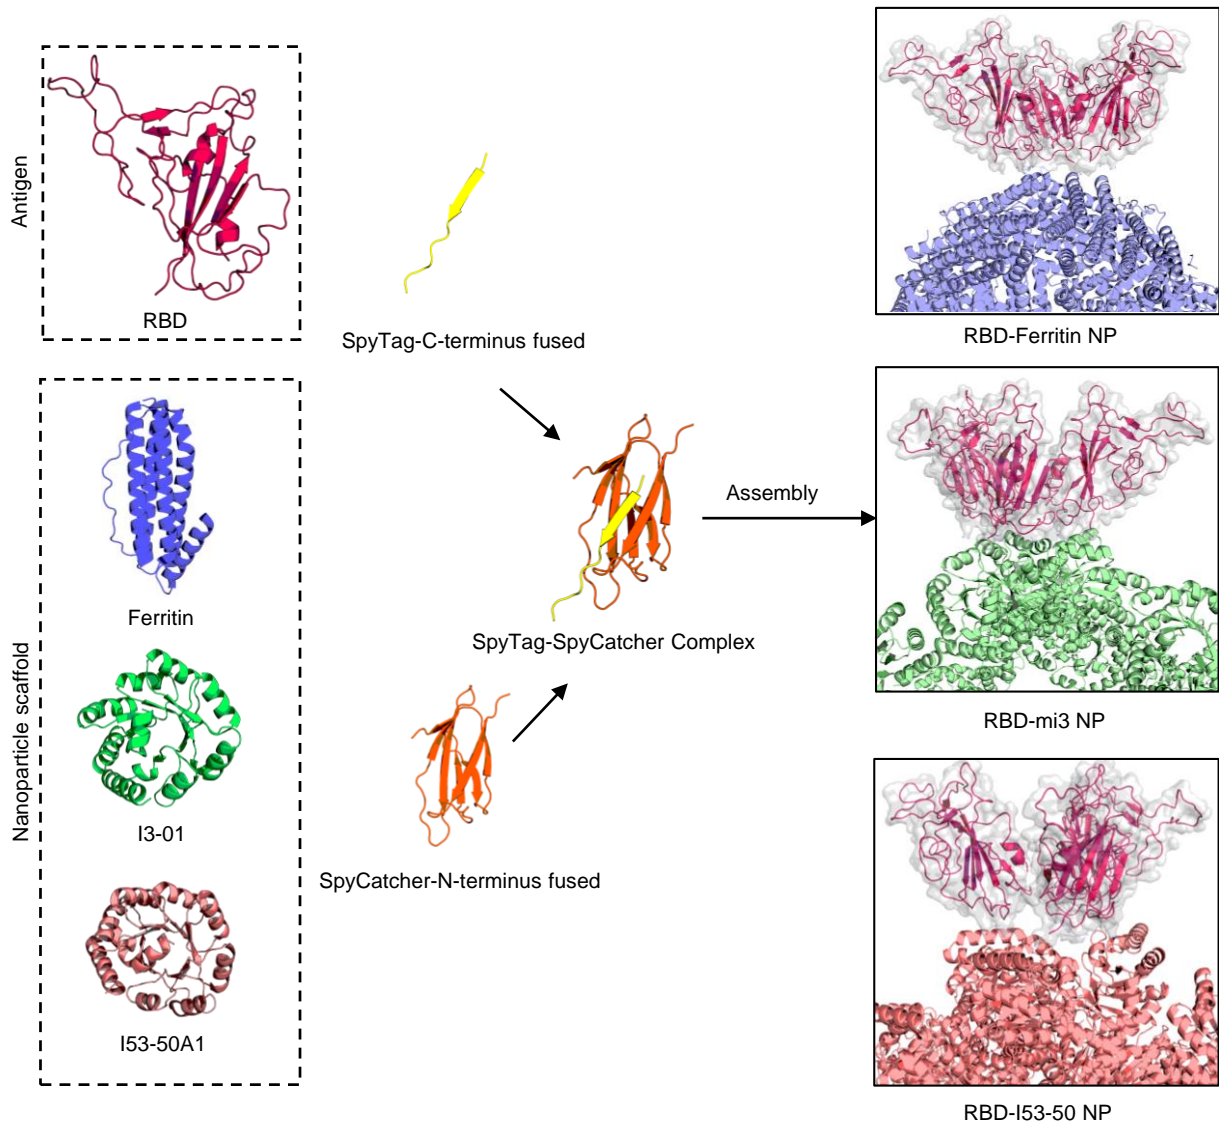

Figure S3

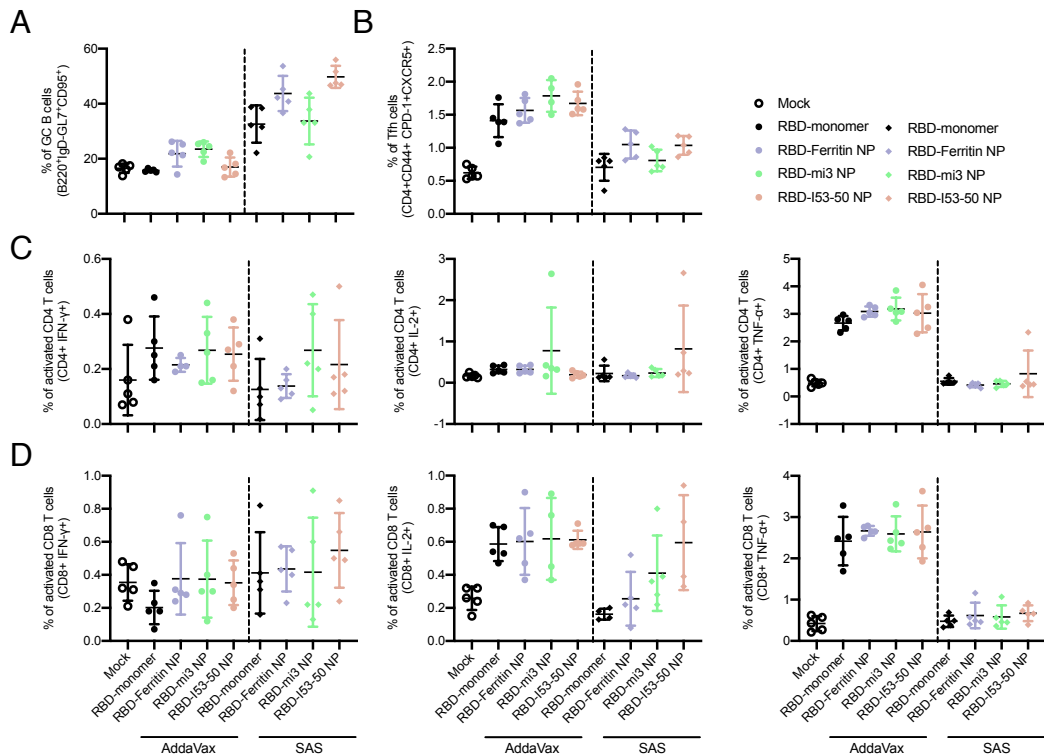

Figure S4

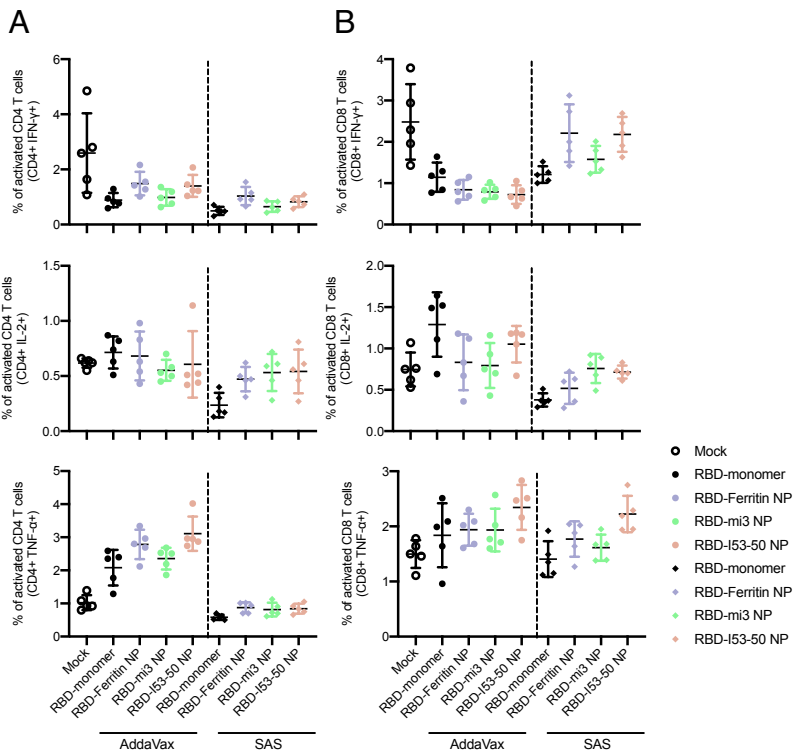

Source: https://www.biorxiv.org/content/10.1101/2020.11.03.366138v1.full.pdf
